# Supplementary material for: Crop Rotation and Straw Application Impact Microbial Communities in Italian and Philippine Soils and the Rhizosphere of Zea mays
Source: Front Microbiol. 2018 Jun 15;9:1295. doi: 10.3389/fmicb.2018.01295 (PMC6013709; doi:10.3389/fmicb.2018.01295)
Supplement: Supplementary file 2 [file Data_Sheet_2.xlsx]

## Sheet: A_crop rotation_Bac
bacterial and archaeal genera affected by crop rotation at the three different field locations
Domain	Phylum	Class	Order	Family	Genus	Italy		IRRI		Tarlac
						MM	RR	MR	RR	MR	RR
Bacteria	Acidobacteria	Acidobacteria_Gp1	Acidicapsa	Acidicapsa_borealis	Unclassified Acidicapsa_borealis	+
Bacteria	Acidobacteria	Acidobacteria_Gp1	Candidatus_Koribacter	Unclassified Candidatus_Koribacter	Unclassified Candidatus_Koribacter		+
Bacteria	Acidobacteria	Acidobacteria_Gp1	Edaphobacter	Edaphobacter_modestus	Unclassified Edaphobacter_modestus	+
Bacteria	Acidobacteria	Acidobacteria_Gp1	Gp1	Unclassified Gp1	Unclassified Gp1	+
Bacteria	Acidobacteria	Acidobacteria_Gp1	Granulicella	Unclassified Granulicella	Unclassified Granulicella	+
Bacteria	Acidobacteria	Acidobacteria_Gp1	Telmatobacter	Telmatobacter_bradus	Unclassified Telmatobacter_bradus					+
Bacteria	Acidobacteria	Acidobacteria_Gp1	Terriglobus	Unclassified Terriglobus	Unclassified Terriglobus	+
Bacteria	Acidobacteria	Acidobacteria_Gp1	Unclassified Acidobacteria_Gp1	Unclassified Acidobacteria_Gp1	Unclassified Acidobacteria_Gp1	+
Bacteria	Acidobacteria	Acidobacteria_Gp2	Gp2	Unclassified Gp2	Unclassified Gp2	+					+
Bacteria	Acidobacteria	Acidobacteria_Gp3	Candidatus_Solibacter	Unclassified Candidatus_Solibacter	Unclassified Candidatus_Solibacter		+
Bacteria	Acidobacteria	Acidobacteria_Gp3	Gp3	Unclassified Gp3	Unclassified Gp3	+
Bacteria	Acidobacteria	Acidobacteria_Gp4	Aridibacter	Unclassified Aridibacter	Unclassified Aridibacter		+
Bacteria	Acidobacteria	Acidobacteria_Gp4	Gp4	Unclassified Gp4	Unclassified Gp4		+
Bacteria	Acidobacteria	Acidobacteria_Gp4	Unclassified Acidobacteria_Gp4	Unclassified Acidobacteria_Gp4	Unclassified Acidobacteria_Gp4		+
Bacteria	Acidobacteria	Acidobacteria_Gp5	Gp5	Unclassified Gp5	Unclassified Gp5	+
Bacteria	Acidobacteria	Acidobacteria_Gp6	Gp6	Unclassified Gp6	Unclassified Gp6		+		+		+
Bacteria	Acidobacteria	Acidobacteria_Gp7	Gp7	Unclassified Gp7	Unclassified Gp7		+
Bacteria	Acidobacteria	Acidobacteria_Gp7	Unclassified Acidobacteria_Gp7	Unclassified Acidobacteria_Gp7	Unclassified Acidobacteria_Gp7		+
Bacteria	Acidobacteria	Acidobacteria_Gp9	Gp9	Unclassified Gp9	Unclassified Gp9	+
Bacteria	Acidobacteria	Acidobacteria_Gp10	Gp10	Unclassified Gp10	Unclassified Gp10		+			+
Bacteria	Acidobacteria	Acidobacteria_Gp10	Unclassified Acidobacteria_Gp10	Unclassified Acidobacteria_Gp10	Unclassified Acidobacteria_Gp10		+
Bacteria	Acidobacteria	Acidobacteria_Gp11	Gp11	Unclassified Gp11	Unclassified Gp11		+
Bacteria	Acidobacteria	Acidobacteria_Gp12	Gp12	Unclassified Gp12	Unclassified Gp12		+
Bacteria	Acidobacteria	Acidobacteria_Gp13	Gp13	Unclassified Gp13	Unclassified Gp13	+					+
Bacteria	Acidobacteria	Acidobacteria_Gp13	Unclassified Acidobacteria_Gp13	Unclassified Acidobacteria_Gp13	Unclassified Acidobacteria_Gp13	+
Bacteria	Acidobacteria	Acidobacteria_Gp14	Gp14	Unclassified Gp14	Unclassified Gp14	+
Bacteria	Acidobacteria	Acidobacteria_Gp14	Unclassified Acidobacteria_Gp14	Unclassified Acidobacteria_Gp14	Unclassified Acidobacteria_Gp14	+
Bacteria	Acidobacteria	Acidobacteria_Gp15	Gp15	Unclassified Gp15	Unclassified Gp15		+
Bacteria	Acidobacteria	Acidobacteria_Gp16	Gp16	Unclassified Gp16	Unclassified Gp16		+				+
Bacteria	Acidobacteria	Acidobacteria_Gp16	Unclassified Acidobacteria_Gp16	Unclassified Acidobacteria_Gp16	Unclassified Acidobacteria_Gp16		+
Bacteria	Acidobacteria	Acidobacteria_Gp17	Gp17	Unclassified Gp17	Unclassified Gp17		+				+
Bacteria	Acidobacteria	Acidobacteria_Gp18	Gp18	Unclassified Gp18	Unclassified Gp18		+				+
Bacteria	Acidobacteria	Acidobacteria_Gp18	Unclassified Acidobacteria_Gp18	Unclassified Acidobacteria_Gp18	Unclassified Acidobacteria_Gp18		+
Bacteria	Acidobacteria	Acidobacteria_Gp25	Gp25	Unclassified Gp25	Unclassified Gp25		+	+			+
Bacteria	Acidobacteria	Holophagae	Holophagales	Holophagaceae	Geothrix	+
Bacteria	Acidobacteria	Unclassified Acidobacteria	Unclassified Acidobacteria	Unclassified Acidobacteria	Unclassified Acidobacteria		+
Bacteria	Actinobacteria	Actinobacteria	Acidimicrobiales	Acidimicrobineae_incertae_sedis	Aciditerrimonas	+
Bacteria	Actinobacteria	Actinobacteria	Acidimicrobiales	Iamiaceae	Aquihabitans		+
Bacteria	Actinobacteria	Actinobacteria	Acidimicrobiales	Iamiaceae	Unclassified Iamiaceae		+
Bacteria	Actinobacteria	Actinobacteria	Acidimicrobiales	Unclassified Acidimicrobiales	Unclassified Acidimicrobiales		+
Bacteria	Actinobacteria	Actinobacteria	Actinomycetales	Acidothermaceae	Acidothermus	+
Bacteria	Actinobacteria	Actinobacteria	Actinomycetales	Actinospicaceae	Actinospica	+
Bacteria	Actinobacteria	Actinobacteria	Actinomycetales	Bogoriellaceae	Georgenia	+
Bacteria	Actinobacteria	Actinobacteria	Actinomycetales	Brevibacteriaceae	Brevibacterium	+
Bacteria	Actinobacteria	Actinobacteria	Actinomycetales	Catenulisporaceae	Catenulispora	+
Bacteria	Actinobacteria	Actinobacteria	Actinomycetales	Cellulomonadaceae	Cellulomonas	+
Bacteria	Actinobacteria	Actinobacteria	Actinomycetales	Dermabacteraceae	Brachybacterium	+
Bacteria	Actinobacteria	Actinobacteria	Actinomycetales	Dermacoccaceae	Unclassified Dermacoccaceae	+
Bacteria	Actinobacteria	Actinobacteria	Actinomycetales	Dermatophilaceae	Unclassified Dermatophilaceae		+
Bacteria	Actinobacteria	Actinobacteria	Actinomycetales	Glycomycetaceae	Glycomyces	+
Bacteria	Actinobacteria	Actinobacteria	Actinomycetales	Glycomycetaceae	Stackebrandtia	+
Bacteria	Actinobacteria	Actinobacteria	Actinomycetales	Intrasporangiaceae	Intrasporangium		+
Bacteria	Actinobacteria	Actinobacteria	Actinomycetales	Intrasporangiaceae	Ornithinimicrobium	+
Bacteria	Actinobacteria	Actinobacteria	Actinomycetales	Intrasporangiaceae	Oryzihumus		+
Bacteria	Actinobacteria	Actinobacteria	Actinomycetales	Intrasporangiaceae	Phycicoccus	+
Bacteria	Actinobacteria	Actinobacteria	Actinomycetales	Intrasporangiaceae	Terrabacter	+
Bacteria	Actinobacteria	Actinobacteria	Actinomycetales	Kineosporiaceae	Angustibacter		+
Bacteria	Actinobacteria	Actinobacteria	Actinomycetales	Kineosporiaceae	Unclassified Kineosporiaceae	+
Bacteria	Actinobacteria	Actinobacteria	Actinomycetales	Microbacteriaceae	Agromyces	+
Bacteria	Actinobacteria	Actinobacteria	Actinomycetales	Microbacteriaceae	Gryllotalpicola	+
Bacteria	Actinobacteria	Actinobacteria	Actinomycetales	Microbacteriaceae	Leifsonia	+
Bacteria	Actinobacteria	Actinobacteria	Actinomycetales	Microbacteriaceae	Leucobacter	+
Bacteria	Actinobacteria	Actinobacteria	Actinomycetales	Microbacteriaceae	Microbacterium	+
Bacteria	Actinobacteria	Actinobacteria	Actinomycetales	Micrococcaceae	Kocuria	+
Bacteria	Actinobacteria	Actinobacteria	Actinomycetales	Micrococcaceae	Sinomonas	+
Bacteria	Actinobacteria	Actinobacteria	Actinomycetales	Micromonosporaceae	Actinoplanes		+	+
Bacteria	Actinobacteria	Actinobacteria	Actinomycetales	Micromonosporaceae	Micromonospora	+
Bacteria	Actinobacteria	Actinobacteria	Actinomycetales	Micromonosporaceae	Rugosimonospora	+		+
Bacteria	Actinobacteria	Actinobacteria	Actinomycetales	Micromonosporaceae	Virgisporangium		+
Bacteria	Actinobacteria	Actinobacteria	Actinomycetales	Micromonosporaceae	Unclassified Micromonosporaceae		+
Bacteria	Actinobacteria	Actinobacteria	Actinomycetales	Mycobacteriaceae	Mycobacterium		+
Bacteria	Actinobacteria	Actinobacteria	Actinomycetales	Nocardiaceae	Nocardia	+
Bacteria	Actinobacteria	Actinobacteria	Actinomycetales	Nocardioidaceae	Kribbella	+
Bacteria	Actinobacteria	Actinobacteria	Actinomycetales	Nocardioidaceae	Marmoricola				+
Bacteria	Actinobacteria	Actinobacteria	Actinomycetales	Nocardioidaceae	Nocardioides		+		+
Bacteria	Actinobacteria	Actinobacteria	Actinomycetales	Promicromonosporaceae	Promicromonospora	+
Bacteria	Actinobacteria	Actinobacteria	Actinomycetales	Propionibacteriaceae	Aestuariimicrobium	+
Bacteria	Actinobacteria	Actinobacteria	Actinomycetales	Propionibacteriaceae	Propionibacterium	+
Bacteria	Actinobacteria	Actinobacteria	Actinomycetales	Propionibacteriaceae	Propionicimonas		+
Bacteria	Actinobacteria	Actinobacteria	Actinomycetales	Pseudonocardiaceae	Actinosynnema	+
Bacteria	Actinobacteria	Actinobacteria	Actinomycetales	Pseudonocardiaceae	Allokutzneria	+
Bacteria	Actinobacteria	Actinobacteria	Actinomycetales	Pseudonocardiaceae	Amycolatopsis	+
Bacteria	Actinobacteria	Actinobacteria	Actinomycetales	Pseudonocardiaceae	Pseudonocardia	+
Bacteria	Actinobacteria	Actinobacteria	Actinomycetales	Pseudonocardiaceae	Unclassified Pseudonocardiaceae	+
Bacteria	Actinobacteria	Actinobacteria	Actinomycetales	Sanguibacteraceae	Sanguibacter	+
Bacteria	Actinobacteria	Actinobacteria	Actinomycetales	Streptomycetaceae	Streptomyces	+
Bacteria	Actinobacteria	Actinobacteria	Actinomycetales	Streptomycetaceae	Unclassified Streptomycetaceae	+
Bacteria	Actinobacteria	Actinobacteria	Actinomycetales	Streptosporangiaceae	Sphaerisporangium	+
Bacteria	Actinobacteria	Actinobacteria	Actinomycetales	Streptosporangiaceae	Streptosporangium	+
Bacteria	Actinobacteria	Actinobacteria	Actinomycetales	Streptosporangiaceae	Unclassified Streptosporangiaceae	+
Bacteria	Actinobacteria	Actinobacteria	Actinomycetales	Thermomonosporaceae	Actinoallomurus	+
Bacteria	Actinobacteria	Actinobacteria	Actinomycetales	Thermomonosporaceae	Actinocorallia	+
Bacteria	Actinobacteria	Actinobacteria	Actinomycetales	Thermomonosporaceae	Unclassified Thermomonosporaceae	+			+
Bacteria	Actinobacteria	Actinobacteria	Actinomycetales	Unclassified Actinomycetales	Unclassified Actinomycetales	+
Bacteria	Actinobacteria	Actinobacteria	Gaiellales	Gaiellaceae	Gaiella	+
Bacteria	Actinobacteria	Actinobacteria	Rubrobacterales	Rubrobacteraceae	Rubrobacter	+
Bacteria	Actinobacteria	Actinobacteria	Solirubrobacterales	Conexibacteraceae	Conexibacter	+				+
Bacteria	Aminicenantes	Unclassified Aminicenantes	Unclassified Aminicenantes	Unclassified Aminicenantes	Unclassified Aminicenantes		+
Bacteria	Armatimonadetes	Armatimonadetes_gp2	Unclassified Armatimonadetes_gp2	Unclassified Armatimonadetes_gp2	Unclassified Armatimonadetes_gp2		+
Bacteria	Armatimonadetes	Armatimonadetes_gp4	Unclassified Armatimonadetes_gp4	Unclassified Armatimonadetes_gp4	Unclassified Armatimonadetes_gp4		+
Bacteria	Armatimonadetes	Armatimonadetes_gp5	Unclassified Armatimonadetes_gp5	Unclassified Armatimonadetes_gp5	Unclassified Armatimonadetes_gp5		+
Bacteria	Armatimonadetes	Armatimonadia	Armatimonadales	Armatimonadaceae	Armatimonas/Armatimonadetes_gp1	+
Bacteria	Armatimonadetes	Chthonomonadetes	Chthonomonadales	Chthonomonadaceae	Chthonomonas/Armatimonadetes_gp3		+
Bacteria	Armatimonadetes	Unclassified Armatimonadetes	Unclassified Armatimonadetes	Unclassified Armatimonadetes	Unclassified Armatimonadetes		+
Bacteria	Bacteroidetes	Bacteroidia	Bacteroidales	Prolixibacteraceae	Unclassified Prolixibacteraceae						+
Bacteria	Bacteroidetes	Bacteroidia	Bacteroidales	Unclassified Bacteroidales	Unclassified Bacteroidales		+
Bacteria	Bacteroidetes	Cytophagia	Cytophagales	Cytophagaceae	Adhaeribacter	+					+
Bacteria	Bacteroidetes	Cytophagia	Cytophagales	Cytophagaceae	Dyadobacter	+
Bacteria	Bacteroidetes	Cytophagia	Cytophagales	Cytophagaceae	Hymenobacter		+
Bacteria	Bacteroidetes	Cytophagia	Cytophagales	Cytophagaceae	Pontibacter	+
Bacteria	Bacteroidetes	Cytophagia	Cytophagales	Ohtaekwangia	Ohtaekwangia_kribbensis	+
Bacteria	Bacteroidetes	Flavobacteriia	Flavobacteriales	Cryomorphaceae	Fluviicola		+
Bacteria	Bacteroidetes	Flavobacteriia	Flavobacteriales	Cryomorphaceae	Unclassified Cryomorphaceae		+
Bacteria	Bacteroidetes	Flavobacteriia	Flavobacteriales	Flavobacteriaceae	Chryseobacterium	+
Bacteria	Bacteroidetes	Flavobacteriia	Flavobacteriales	Flavobacteriaceae	Cloacibacterium	+
Bacteria	Bacteroidetes	Flavobacteriia	Flavobacteriales	Unclassified Flavobacteriales	Unclassified Flavobacteriales	+
Bacteria	Bacteroidetes	Sphingobacteriia	Sphingobacteriales	Chitinophagaceae	Arachidicoccus	+
Bacteria	Bacteroidetes	Sphingobacteriia	Sphingobacteriales	Chitinophagaceae	Chitinophaga	+
Bacteria	Bacteroidetes	Sphingobacteriia	Sphingobacteriales	Chitinophagaceae	Ferruginibacter		+
Bacteria	Bacteroidetes	Sphingobacteriia	Sphingobacteriales	Chitinophagaceae	Flavisolibacter		+
Bacteria	Bacteroidetes	Sphingobacteriia	Sphingobacteriales	Chitinophagaceae	Parasegetibacter		+
Bacteria	Bacteroidetes	Sphingobacteriia	Sphingobacteriales	Chitinophagaceae	Segetibacter		+
Bacteria	Bacteroidetes	Sphingobacteriia	Sphingobacteriales	Chitinophagaceae	Taibaiella	+
Bacteria	Bacteroidetes	Sphingobacteriia	Sphingobacteriales	Chitinophagaceae	Terrimonas		+	+
Bacteria	Bacteroidetes	Sphingobacteriia	Sphingobacteriales	Chitinophagaceae	Unclassified Chitinophagaceae	+
Bacteria	Bacteroidetes	Sphingobacteriia	Sphingobacteriales	Sphingobacteriaceae	Mucilaginibacter	+
Bacteria	Bacteroidetes	Sphingobacteriia	Sphingobacteriales	Sphingobacteriaceae	Solitalea						+
Bacteria	Bacteroidetes	Sphingobacteriia	Sphingobacteriales	Sphingobacteriaceae	Sphingobacterium	+
Bacteria	Bacteroidetes	Sphingobacteriia	Sphingobacteriales	Sphingobacteriaceae	Unclassified Sphingobacteriaceae	+
Bacteria	Bacteroidetes	Sphingobacteriia	Sphingobacteriales	Unclassified Sphingobacteriales	Unclassified Sphingobacteriales	+
Bacteria	Bacteroidetes	Unclassified Bacteroidetes	Unclassified Bacteroidetes	Unclassified Bacteroidetes	Unclassified Bacteroidetes		+
Bacteria	BRC1	BRC1_genera_incertae_sedis	Unclassified BRC1_genera_incertae_sedis	Unclassified BRC1_genera_incertae_sedis	Unclassified BRC1_genera_incertae_sedis		+				+
Bacteria	candidate_division_WPS-1	WPS-1_genera_incertae_sedis	Unclassified WPS-1_genera_incertae_sedis	Unclassified WPS-1_genera_incertae_sedis	Unclassified WPS-1_genera_incertae_sedis	+				+
Bacteria	candidate_division_WPS-1	Unclassified candidate_division_WPS-1	Unclassified candidate_division_WPS-1	Unclassified candidate_division_WPS-1	Unclassified candidate_division_WPS-1			+
Bacteria	candidate_division_WPS-2	WPS-2_genera_incertae_sedis	Unclassified WPS-2_genera_incertae_sedis	Unclassified WPS-2_genera_incertae_sedis	Unclassified WPS-2_genera_incertae_sedis	+
Bacteria	candidate_division_WPS-2	Unclassified candidate_division_WPS-2	Unclassified candidate_division_WPS-2	Unclassified candidate_division_WPS-2	Unclassified candidate_division_WPS-2	+
Bacteria	Candidatus Saccharibacteria	Saccharibacteria genera incertae sedis	Unclassified Saccharibacteria genera incertae sedis	Unclassified Saccharibacteria genera incertae sedis	Unclassified Saccharibacteria genera incertae sedis		+
Bacteria	Chlamydiae	Chlamydiia	Chlamydiales	Parachlamydiaceae	Parachlamydia	+
Bacteria	Chlamydiae	Chlamydiia	Chlamydiales	Parachlamydiaceae	Unclassified Parachlamydiaceae			+
Bacteria	Chlamydiae	Chlamydiia	Chlamydiales	Unclassified Chlamydiales	Unclassified Chlamydiales	+
Bacteria	Chloroflexi	Anaerolineae	Anaerolineales	Anaerolineaceae	Anaerolinea		+				+
Bacteria	Chloroflexi	Anaerolineae	Anaerolineales	Anaerolineaceae	Leptolinea				+
Bacteria	Chloroflexi	Anaerolineae	Anaerolineales	Anaerolineaceae	Longilinea		+
Bacteria	Chloroflexi	Anaerolineae	Anaerolineales	Anaerolineaceae	Ornatilinea		+
Bacteria	Chloroflexi	Anaerolineae	Anaerolineales	Anaerolineaceae	Thermomarinilinea		+	+
Bacteria	Chloroflexi	Anaerolineae	Anaerolineales	Anaerolineaceae	Unclassified Anaerolineaceae		+
Bacteria	Chloroflexi	Caldilineae	Caldilineales	Caldilineaceae	Litorilinea		+				+
Bacteria	Chloroflexi	Caldilineae	Caldilineales	Caldilineaceae	Unclassified Caldilineaceae		+
Bacteria	Chloroflexi	Chloroflexia	Herpetosiphonales	Herpetosiphonaceae	Herpetosiphon		+		+
Bacteria	Chloroflexi	Ktedonobacteria	Ktedonobacterales	Ktedonobacteraceae	Ktedonobacter	+
Bacteria	Chloroflexi	Ktedonobacteria	Ktedonobacterales	Unclassified Ktedonobacterales	Unclassified Ktedonobacterales	+
Bacteria	Chloroflexi	Ktedonobacteria	Thermogemmatisporales	Thermogemmatisporaceae	Thermogemmatispora		+
Bacteria	Chloroflexi	Ktedonobacteria	Unclassified Ktedonobacteria	Unclassified Ktedonobacteria	Unclassified Ktedonobacteria	+
Bacteria	Chloroflexi	Thermomicrobia	Sphaerobacterales	Sphaerobacteraceae	Unclassified Sphaerobacteraceae	+
Bacteria	Chloroflexi	Unclassified Chloroflexi	Unclassified Chloroflexi	Unclassified Chloroflexi	Unclassified Chloroflexi		+
Bacteria	Cyanobacteria/Chloroplast	Cyanobacteria	Family_I	GpI	Unclassified GpI		+
Bacteria	Cyanobacteria/Chloroplast	Cyanobacteria	Family_IV	GpIV	Unclassified GpIV	+
Bacteria	Cyanobacteria/Chloroplast	Cyanobacteria	Family_V	GpV	Unclassified GpV		+
Bacteria	Cyanobacteria/Chloroplast	Cyanobacteria	Family_XI	GpXI	Unclassified GpXI		+
Bacteria	Cyanobacteria/Chloroplast	Cyanobacteria	Unclassified Cyanobacteria	Unclassified Cyanobacteria	Unclassified Cyanobacteria		+
Bacteria	Cyanobacteria/Chloroplast	Unclassified Cyanobacteria/Chloroplast	Unclassified Cyanobacteria/Chloroplast	Unclassified Cyanobacteria/Chloroplast	Unclassified Cyanobacteria/Chloroplast	+
Bacteria	Firmicutes	Bacilli	Bacillales	Alicyclobacillaceae	Alicyclobacillus	+
Bacteria	Firmicutes	Bacilli	Bacillales	Alicyclobacillaceae	Tumebacillus	+
Bacteria	Firmicutes	Bacilli	Bacillales	Bacillaceae_1	Bacillus	+
Bacteria	Firmicutes	Bacilli	Bacillales	Bacillaceae_1	Fictibacillus	+
Bacteria	Firmicutes	Bacilli	Bacillales	Bacillaceae_1	Unclassified Bacillaceae_1	+
Bacteria	Firmicutes	Bacilli	Bacillales	Bacillaceae_2	Virgibacillus	+
Bacteria	Firmicutes	Bacilli	Bacillales	Bacillaceae2	Unclassified Bacillaceae2	+
Bacteria	Firmicutes	Bacilli	Bacillales	Bacillales_Incertae_Sedis_XII	Exiguobacterium	+
Bacteria	Firmicutes	Bacilli	Bacillales	Paenibacillaceae_1	Cohnella	+
Bacteria	Firmicutes	Bacilli	Bacillales	Paenibacillaceae_1	Paenibacillus	+
Bacteria	Firmicutes	Bacilli	Bacillales	Paenibacillaceae_1	Thermobacillus				+
Bacteria	Firmicutes	Bacilli	Bacillales	Paenibacillaceae_1	Unclassified Paenibacillaceae_1	+
Bacteria	Firmicutes	Bacilli	Bacillales	Paenibacillaceae_2	Unclassified Paenibacillaceae_2	+				+
Bacteria	Firmicutes	Bacilli	Bacillales	Planococcaceae	Sporosarcina	+		+
Bacteria	Firmicutes	Bacilli	Bacillales	Staphylococcaceae	Staphylococcus	+
Bacteria	Firmicutes	Bacilli	Bacillales	Thermoactinomycetaceae_1	Shimazuella	+
Bacteria	Firmicutes	Bacilli	Bacillales	Thermoactinomycetaceae_1	Thermoactinomyces	+				+
Bacteria	Firmicutes	Bacilli	Bacillales	Thermoactinomycetaceae_1	Thermoflavimicrobium	+
Bacteria	Firmicutes	Bacilli	Bacillales	Thermoactinomycetaceae_1	Unclassified Thermoactinomycetaceae_1	+
Bacteria	Firmicutes	Clostridia	Clostridiales	Clostridiaceae_1	Clostridium sensu stricto		+
Bacteria	Firmicutes	Clostridia	Clostridiales	Clostridiaceae_1	Clostridium_sensu_stricto		+
Bacteria	Firmicutes	Clostridia	Clostridiales	Clostridiaceae_1	Fervidicella		+
Bacteria	Firmicutes	Clostridia	Clostridiales	Clostridiaceae_1	Unclassified Clostridiaceae_1		+
Bacteria	Firmicutes	Clostridia	Clostridiales	Heliobacteriaceae	Hydrogenispora		+	+		+
Bacteria	Firmicutes	Clostridia	Clostridiales	Lachnospiraceae	Cellulosilyticum				+
Bacteria	Firmicutes	Clostridia	Clostridiales	Peptococcaceae_1	Unclassified Peptococcaceae_1	+		+
Bacteria	Firmicutes	Clostridia	Clostridiales	Peptococcaceae_2	Desulfotomaculum		+
Bacteria	Firmicutes	Clostridia	Clostridiales	Peptococcaceae_2	Pelotomaculum		+
Bacteria	Firmicutes	Clostridia	Clostridiales	Peptococcaceae_2	Unclassified Peptococcaceae_2		+
Bacteria	Firmicutes	Clostridia	Clostridiales	Peptostreptococcaceae	Sporacetigenium		+
Bacteria	Firmicutes	Clostridia	Clostridiales	Ruminococcaceae	Clostridium_III		+
Bacteria	Firmicutes	Clostridia	Clostridiales	Ruminococcaceae	Sporobacter		+
Bacteria	Firmicutes	Clostridia	Clostridiales	Ruminococcaceae	Unclassified Ruminococcaceae		+
Bacteria	Firmicutes	Clostridia	Clostridiales	Syntrophomonadaceae	Syntrophomonas		+
Bacteria	Firmicutes	Clostridia	Clostridiales	Syntrophomonadaceae	Unclassified Syntrophomonadaceae		+
Bacteria	Firmicutes	Clostridia	Clostridiales	Unclassified Clostridiales	Unclassified Clostridiales		+
Bacteria	Firmicutes	Negativicutes	Selenomonadales	Veillonellaceae	Propionispira		+		+
Bacteria	Firmicutes	Negativicutes	Selenomonadales	Veillonellaceae	Propionispora		+
Bacteria	Firmicutes	Negativicutes	Selenomonadales	Veillonellaceae	Sporomusa		+
Bacteria	Firmicutes	Negativicutes	Selenomonadales	Veillonellaceae	Unclassified Veillonellaceae		+
Bacteria	Firmicutes	Unclassified Firmicutes	Unclassified Firmicutes	Unclassified Firmicutes	Unclassified Firmicutes		+
Bacteria	Gemmatimonadetes	Gemmatimonadetes	Gemmatimonadales	Gemmatimonadaceae	Gemmatimonas		+
Bacteria	Hydrogenedentes	Unclassified Hydrogenedentes	Unclassified Hydrogenedentes	Unclassified Hydrogenedentes	Unclassified Hydrogenedentes		+
Bacteria	Ignavibacteriae	Ignavibacteria	Ignavibacteriales	Ignavibacteriaceae	Ignavibacterium		+				+
Bacteria	Ignavibacteriae	Ignavibacteria	Ignavibacteriales	Ignavibacteriaceae	Melioribacter		+
Bacteria	Ignavibacteriae	Ignavibacteria	Ignavibacteriales	Ignavibacteriaceae	Unclassified Ignavibacteriaceae		+				+
Bacteria	Latescibacteria	Latescibacteria_genera_incertae_sedis	Unclassified Latescibacteria_genera_incertae_sedis	Unclassified Latescibacteria_genera_incertae_sedis	Unclassified Latescibacteria_genera_incertae_sedis		+				+
Bacteria	Latescibacteria	Unclassified Latescibacteria	Unclassified Latescibacteria	Unclassified Latescibacteria	Unclassified Latescibacteria		+
Bacteria	Microgenomates	Microgenomates_genera_incertae_sedis	Unclassified Microgenomates_genera_incertae_sedis	Unclassified Microgenomates_genera_incertae_sedis	Unclassified Microgenomates_genera_incertae_sedis		+
Bacteria	Microgenomates	Unclassified Microgenomates	Unclassified Microgenomates	Unclassified Microgenomates	Unclassified Microgenomates		+				+
Bacteria	Nitrospirae	Nitrospira	Nitrospirales	Nitrospiraceae	Nitrospira		+
Bacteria	Nitrospirae	Nitrospira	Nitrospirales	Nitrospiraceae	Thermodesulfovibrio		+				+
Bacteria	Nitrospirae	Nitrospira	Nitrospirales	Nitrospiraceae	Unclassified Nitrospiraceae	+
Bacteria	Parcubacteria	Parcubacteria_genera_incertae_sedis	Unclassified Parcubacteria_genera_incertae_sedis	Unclassified Parcubacteria_genera_incertae_sedis	Unclassified Parcubacteria_genera_incertae_sedis		+
Bacteria	Parcubacteria	Unclassified Parcubacteria	Unclassified Parcubacteria	Unclassified Parcubacteria	Unclassified Parcubacteria		+
Bacteria	Planctomycetes	Phycisphaerae	Tepidisphaerales	Tepidisphaeraceae	Tepidisphaera		+	+
Bacteria	Planctomycetes	Planctomycetia	Planctomycetales	Planctomycetaceae	Gemmata	+
Bacteria	Planctomycetes	Planctomycetia	Planctomycetales	Planctomycetaceae	Pirellula						+
Bacteria	Planctomycetes	Planctomycetia	Planctomycetales	Planctomycetaceae	Rubinisphaera	+
Bacteria	Planctomycetes	Planctomycetia	Planctomycetales	Planctomycetaceae	Thermogutta		+
Bacteria	Planctomycetes	Planctomycetia	Planctomycetales	Planctomycetaceae	Zavarzinella		+
Bacteria	Planctomycetes	Planctomycetia	Planctomycetales	Planctomycetaceae	Unclassified Planctomycetaceae	+
Bacteria	Proteobacteria	Alphaproteobacteria	Alphaproteobacteria_incertae_sedis	Unclassified Alphaproteobacteria_incertae_sedis	Unclassified Alphaproteobacteria_incertae_sedis	+
Bacteria	Proteobacteria	Alphaproteobacteria	Caulobacterales	Caulobacteraceae	Asticcacaulis		+
Bacteria	Proteobacteria	Alphaproteobacteria	Caulobacterales	Caulobacteraceae	Brevundimonas	+
Bacteria	Proteobacteria	Alphaproteobacteria	Caulobacterales	Caulobacteraceae	Caulobacter		+
Bacteria	Proteobacteria	Alphaproteobacteria	Caulobacterales	Caulobacteraceae	Unclassified Caulobacteraceae	+
Bacteria	Proteobacteria	Alphaproteobacteria	Rhizobiales	Aurantimonadaceae	Aureimonas	+
Bacteria	Proteobacteria	Alphaproteobacteria	Rhizobiales	Beijerinckiaceae	Unclassified Beijerinckiaceae	+
Bacteria	Proteobacteria	Alphaproteobacteria	Rhizobiales	Bradyrhizobiaceae	Bosea	+
Bacteria	Proteobacteria	Alphaproteobacteria	Rhizobiales	Bradyrhizobiaceae	Rhodopseudomonas	+
Bacteria	Proteobacteria	Alphaproteobacteria	Rhizobiales	Bradyrhizobiaceae	Unclassified Bradyrhizobiaceae	+
Bacteria	Proteobacteria	Alphaproteobacteria	Rhizobiales	Brucellaceae	Ochrobactrum	+
Bacteria	Proteobacteria	Alphaproteobacteria	Rhizobiales	Hyphomicrobiaceae	Devosia	+
Bacteria	Proteobacteria	Alphaproteobacteria	Rhizobiales	Hyphomicrobiaceae	Pedomicrobium		+
Bacteria	Proteobacteria	Alphaproteobacteria	Rhizobiales	Hyphomicrobiaceae	Rhodomicrobium		+
Bacteria	Proteobacteria	Alphaproteobacteria	Rhizobiales	Hyphomicrobiaceae	Unclassified Hyphomicrobiaceae		+
Bacteria	Proteobacteria	Alphaproteobacteria	Rhizobiales	Methylobacteriaceae	Methylobacterium	+
Bacteria	Proteobacteria	Alphaproteobacteria	Rhizobiales	Methylocystaceae	Unclassified Methylocystaceae		+
Bacteria	Proteobacteria	Alphaproteobacteria	Rhizobiales	Rhizobiaceae	Rhizobium	+
Bacteria	Proteobacteria	Alphaproteobacteria	Rhizobiales	Rhizobiaceae	Unclassified Rhizobiaceae	+
Bacteria	Proteobacteria	Alphaproteobacteria	Rhizobiales	Rhizobiales_incertae_sedis	Alsobacter		+
Bacteria	Proteobacteria	Alphaproteobacteria	Rhizobiales	Rhodobiaceae	Unclassified Rhodobiaceae	+
Bacteria	Proteobacteria	Alphaproteobacteria	Rhizobiales	Roseiarcaceae	Roseiarcus	+
Bacteria	Proteobacteria	Alphaproteobacteria	Rhizobiales	Xanthobacteraceae	Ancylobacter	+
Bacteria	Proteobacteria	Alphaproteobacteria	Rhizobiales	Xanthobacteraceae	Pseudolabrys		+
Bacteria	Proteobacteria	Alphaproteobacteria	Rhizobiales	Unclassified Rhizobiales	Unclassified Rhizobiales		+
Bacteria	Proteobacteria	Alphaproteobacteria	Rhodobacterales	Rhodobacteraceae	Rhodobacter	+
Bacteria	Proteobacteria	Alphaproteobacteria	Rhodobacterales	Rhodobacteraceae	Rubellimicrobium	+
Bacteria	Proteobacteria	Alphaproteobacteria	Rhodospirillales	Acetobacteraceae	Acidicaldus	+
Bacteria	Proteobacteria	Alphaproteobacteria	Rhodospirillales	Acetobacteraceae	Acidisoma	+
Bacteria	Proteobacteria	Alphaproteobacteria	Rhodospirillales	Acetobacteraceae	Belnapia		+
Bacteria	Proteobacteria	Alphaproteobacteria	Rhodospirillales	Acetobacteraceae	Rhodopila	+
Bacteria	Proteobacteria	Alphaproteobacteria	Rhodospirillales	Acetobacteraceae	Unclassified Acetobacteraceae	+
Bacteria	Proteobacteria	Alphaproteobacteria	Rhodospirillales	Reyranella	Unclassified Reyranella	+
Bacteria	Proteobacteria	Alphaproteobacteria	Rhodospirillales	Rhodospirillaceae	Dongia		+
Bacteria	Proteobacteria	Alphaproteobacteria	Rhodospirillales	Rhodospirillaceae	Lacibacterium		+
Bacteria	Proteobacteria	Alphaproteobacteria	Rhodospirillales	Rhodospirillaceae	Skermanella		+
Bacteria	Proteobacteria	Alphaproteobacteria	Rhodospirillales	Rhodospirillaceae	Telmatospirillum	+
Bacteria	Proteobacteria	Alphaproteobacteria	Rhodospirillales	Rhodospirillaceae	Unclassified Rhodospirillaceae	+
Bacteria	Proteobacteria	Alphaproteobacteria	Rhodospirillales	Unclassified Rhodospirillales	Unclassified Rhodospirillales	+
Bacteria	Proteobacteria	Alphaproteobacteria	Rickettsiales	Rickettsiaceae	Rickettsia	+
Bacteria	Proteobacteria	Alphaproteobacteria	Sneathiellales	Sneathiellaceae	Taonella	+
Bacteria	Proteobacteria	Alphaproteobacteria	Sphingomonadales	Erythrobacteraceae	Altererythrobacter	+
Bacteria	Proteobacteria	Alphaproteobacteria	Sphingomonadales	Erythrobacteraceae	Unclassified Erythrobacteraceae	+
Bacteria	Proteobacteria	Alphaproteobacteria	Sphingomonadales	Sphingomonadaceae	Novosphingobium				+
Bacteria	Proteobacteria	Alphaproteobacteria	Sphingomonadales	Sphingomonadaceae	Rhizorhabdus		+
Bacteria	Proteobacteria	Alphaproteobacteria	Sphingomonadales	Sphingomonadaceae	Sphingobium	+
Bacteria	Proteobacteria	Alphaproteobacteria	Sphingomonadales	Sphingomonadaceae	Sphingopyxis	+
Bacteria	Proteobacteria	Alphaproteobacteria	Sphingomonadales	Sphingomonadaceae	Sphingorhabdus	+
Bacteria	Proteobacteria	Alphaproteobacteria	Sphingomonadales	Sphingomonadaceae	Unclassified Sphingomonadaceae	+
Bacteria	Proteobacteria	Alphaproteobacteria	Unclassified Alphaproteobacteria	Unclassified Alphaproteobacteria	Unclassified Alphaproteobacteria	+
Bacteria	Proteobacteria	Betaproteobacteria	Burkholderiales	Alcaligenaceae	Advenella	+
Bacteria	Proteobacteria	Betaproteobacteria	Burkholderiales	Alcaligenaceae	Castellaniella	+
Bacteria	Proteobacteria	Betaproteobacteria	Burkholderiales	Burkholderiaceae	Burkholderia	+
Bacteria	Proteobacteria	Betaproteobacteria	Burkholderiales	Burkholderiaceae	Limnobacter	+
Bacteria	Proteobacteria	Betaproteobacteria	Burkholderiales	Burkholderiaceae	Polynucleobacter	+
Bacteria	Proteobacteria	Betaproteobacteria	Burkholderiales	Burkholderiaceae	Ralstonia	+
Bacteria	Proteobacteria	Betaproteobacteria	Burkholderiales	Comamonadaceae	Ramlibacter		+
Bacteria	Proteobacteria	Betaproteobacteria	Burkholderiales	Oxalobacteraceae	Pseudoduganella		+
Bacteria	Proteobacteria	Betaproteobacteria	Burkholderiales	Oxalobacteraceae	Unclassified Oxalobacteraceae		+
Bacteria	Proteobacteria	Betaproteobacteria	Hydrogenophilales	Hydrogenophilaceae	Thiobacillus		+				+
Bacteria	Proteobacteria	Betaproteobacteria	Methylophilales	Methylophilaceae	Methylophilus	+
Bacteria	Proteobacteria	Betaproteobacteria	Rhodocyclales	Rhodocyclaceae	Unclassified Rhodocyclaceae		+
Bacteria	Proteobacteria	Deltaproteobacteria	Bdellovibrionales	Bacteriovoracaceae	Bacteriovorax		+
Bacteria	Proteobacteria	Deltaproteobacteria	Bdellovibrionales	Bacteriovoracaceae	Peredibacter		+
Bacteria	Proteobacteria	Deltaproteobacteria	Bdellovibrionales	Bacteriovoracaceae	Unclassified Bacteriovoracaceae		+
Bacteria	Proteobacteria	Deltaproteobacteria	Bdellovibrionales	Bdellovibrionaceae	Bdellovibrio		+
Bacteria	Proteobacteria	Deltaproteobacteria	Bdellovibrionales	Bdellovibrionaceae	Vampirovibrio		+
Bacteria	Proteobacteria	Deltaproteobacteria	Deltaproteobacteria_incertae_sedis	Unclassified Deltaproteobacteria_incertae_sedis	Unclassified Deltaproteobacteria_incertae_sedis		+				+
Bacteria	Proteobacteria	Deltaproteobacteria	Desulfobacterales	Desulfobacteraceae	Desulfatiglans		+
Bacteria	Proteobacteria	Deltaproteobacteria	Desulfobacterales	Desulfobacteraceae	Unclassified Desulfobacteraceae		+
Bacteria	Proteobacteria	Deltaproteobacteria	Desulfobacterales	Desulfobulbaceae	Desulfobulbus		+				+
Bacteria	Proteobacteria	Deltaproteobacteria	Desulfobacterales	Desulfobulbaceae	Unclassified Desulfobulbaceae		+
Bacteria	Proteobacteria	Deltaproteobacteria	Desulfovibrionales	Desulfovibrionaceae	Desulfovibrio		+
Bacteria	Proteobacteria	Deltaproteobacteria	Desulfuromonadales	Desulfuromonadaceae	Desulfuromonas				+
Bacteria	Proteobacteria	Deltaproteobacteria	Desulfuromonadales	Desulfuromonadaceae	Unclassified Desulfuromonadaceae				+		+
Bacteria	Proteobacteria	Deltaproteobacteria	Desulfuromonadales	Geobacteraceae	Geobacter		+				+
Bacteria	Proteobacteria	Deltaproteobacteria	Desulfuromonadales	Unclassified Desulfuromonadales	Unclassified Desulfuromonadales		+				+
Bacteria	Proteobacteria	Deltaproteobacteria	Myxococcales	Cystobacteraceae	Anaeromyxobacter		+
Bacteria	Proteobacteria	Deltaproteobacteria	Myxococcales	Cystobacteraceae	Cystobacter		+
Bacteria	Proteobacteria	Deltaproteobacteria	Myxococcales	Cystobacteraceae	Unclassified Cystobacteraceae		+
Bacteria	Proteobacteria	Deltaproteobacteria	Myxococcales	Haliangiaceae	Haliangium		+
Bacteria	Proteobacteria	Deltaproteobacteria	Myxococcales	Labilitrichaceae	Labilithrix		+		+
Bacteria	Proteobacteria	Deltaproteobacteria	Myxococcales	Myxococcaceae	Myxococcus	+
Bacteria	Proteobacteria	Deltaproteobacteria	Myxococcales	Nannocystaceae	Enhygromyxa		+
Bacteria	Proteobacteria	Deltaproteobacteria	Myxococcales	Nannocystaceae	Unclassified Nannocystaceae		+
Bacteria	Proteobacteria	Deltaproteobacteria	Myxococcales	Polyangiaceae	Chondromyces		+
Bacteria	Proteobacteria	Deltaproteobacteria	Myxococcales	Polyangiaceae	Minicystis		+
Bacteria	Proteobacteria	Deltaproteobacteria	Myxococcales	Polyangiaceae	Unclassified Polyangiaceae		+
Bacteria	Proteobacteria	Deltaproteobacteria	Myxococcales	Vulgatibacteraceae	Vulgatibacter	+
Bacteria	Proteobacteria	Deltaproteobacteria	Myxococcales	Unclassified Myxococcales	Unclassified Myxococcales		+
Bacteria	Proteobacteria	Deltaproteobacteria	Syntrophobacterales	Syntrophaceae	Desulfobacca		+
Bacteria	Proteobacteria	Deltaproteobacteria	Syntrophobacterales	Syntrophaceae	Desulfomonile		+
Bacteria	Proteobacteria	Deltaproteobacteria	Syntrophobacterales	Syntrophaceae	Unclassified Syntrophaceae		+				+
Bacteria	Proteobacteria	Deltaproteobacteria	Syntrophobacterales	Syntrophobacteraceae	Desulfovirga		+
Bacteria	Proteobacteria	Deltaproteobacteria	Syntrophobacterales	Syntrophobacteraceae	Syntrophobacter		+				+
Bacteria	Proteobacteria	Deltaproteobacteria	Syntrophobacterales	Syntrophobacteraceae	Unclassified Syntrophobacteraceae		+				+
Bacteria	Proteobacteria	Deltaproteobacteria	Syntrophorhabdaceae	Syntrophorhabdus	Syntrophorhabdus_aromaticivorans		+
Bacteria	Proteobacteria	Deltaproteobacteria	Unclassified Deltaproteobacteria	Unclassified Deltaproteobacteria	Unclassified Deltaproteobacteria		+				+
Bacteria	Proteobacteria	Gammaproteobacteria	Aeromonadales	Aeromonadaceae	Aeromonas	+
Bacteria	Proteobacteria	Gammaproteobacteria	Chromatiales	Chromatiaceae	Nitrosococcus	+
Bacteria	Proteobacteria	Gammaproteobacteria	Enterobacteriales	Enterobacteriaceae	Escherichia/Shigella	+
Bacteria	Proteobacteria	Gammaproteobacteria	Enterobacteriales	Enterobacteriaceae	Morganella		+
Bacteria	Proteobacteria	Gammaproteobacteria	Enterobacteriales	Enterobacteriaceae	Unclassified Enterobacteriaceae	+
Bacteria	Proteobacteria	Gammaproteobacteria	Gammaproteobacteria_incertae_sedis	Unclassified Gammaproteobacteria_incertae_sedis	Unclassified Gammaproteobacteria_incertae_sedis	+
Bacteria	Proteobacteria	Gammaproteobacteria	Legionellales	Coxiellaceae	Coxiella	+
Bacteria	Proteobacteria	Gammaproteobacteria	Legionellales	Coxiellaceae	Diplorickettsia	+
Bacteria	Proteobacteria	Gammaproteobacteria	Legionellales	Legionellaceae	Legionella		+
Bacteria	Proteobacteria	Gammaproteobacteria	Methylococcales	Methylococcaceae	Methylocaldum		+
Bacteria	Proteobacteria	Gammaproteobacteria	Methylococcales	Methylococcaceae	Methylomonas		+
Bacteria	Proteobacteria	Gammaproteobacteria	Methylococcales	Methylococcaceae	Unclassified Methylococcaceae		+				+
Bacteria	Proteobacteria	Gammaproteobacteria	Oceanospirillales	Halomonadaceae	Halomonas	+
Bacteria	Proteobacteria	Gammaproteobacteria	Oceanospirillales	Halomonadaceae	Salinicola	+
Bacteria	Proteobacteria	Gammaproteobacteria	Pseudomonadales	Moraxellaceae	Unclassified Moraxellaceae	+
Bacteria	Proteobacteria	Gammaproteobacteria	Pseudomonadales	Pseudomonadaceae	Cellvibrio		+
Bacteria	Proteobacteria	Gammaproteobacteria	Xanthomonadales	Sinobacteraceae	Alkanibacter	+
Bacteria	Proteobacteria	Gammaproteobacteria	Xanthomonadales	Sinobacteraceae	Nevskia	+
Bacteria	Proteobacteria	Gammaproteobacteria	Xanthomonadales	Sinobacteraceae	Povalibacter		+	+
Bacteria	Proteobacteria	Gammaproteobacteria	Xanthomonadales	Sinobacteraceae	Unclassified Sinobacteraceae	+					+
Bacteria	Proteobacteria	Gammaproteobacteria	Xanthomonadales	Xanthomonadaceae	Arenimonas		+
Bacteria	Proteobacteria	Gammaproteobacteria	Xanthomonadales	Xanthomonadaceae	Chiayiivirga		+
Bacteria	Proteobacteria	Gammaproteobacteria	Xanthomonadales	Xanthomonadaceae	Dokdonella		+
Bacteria	Proteobacteria	Gammaproteobacteria	Xanthomonadales	Xanthomonadaceae	Dyella	+
Bacteria	Proteobacteria	Gammaproteobacteria	Xanthomonadales	Xanthomonadaceae	Luteimonas	+
Bacteria	Proteobacteria	Gammaproteobacteria	Xanthomonadales	Xanthomonadaceae	Lysobacter		+
Bacteria	Proteobacteria	Gammaproteobacteria	Xanthomonadales	Xanthomonadaceae	Rhodanobacter	+
Bacteria	Proteobacteria	Gammaproteobacteria	Xanthomonadales	Xanthomonadaceae	Rudaea	+
Bacteria	Proteobacteria	Gammaproteobacteria	Xanthomonadales	Xanthomonadaceae	Stenotrophomonas	+
Bacteria	Proteobacteria	Gammaproteobacteria	Xanthomonadales	Xanthomonadaceae	Xanthomonas		+
Bacteria	Proteobacteria	Gammaproteobacteria	Xanthomonadales	Xanthomonadaceae	Unclassified Xanthomonadaceae	+
Bacteria	Proteobacteria	Gammaproteobacteria	Unclassified Gammaproteobacteria	Unclassified Gammaproteobacteria	Unclassified Gammaproteobacteria	+
Bacteria	Proteobacteria	Oligoflexia	Oligoflexales	Oligoflexaceae	Oligoflexus		+
Bacteria	Proteobacteria	Unclassified Proteobacteria	Unclassified Proteobacteria	Unclassified Proteobacteria	Unclassified Proteobacteria	+
Bacteria	Spirochaetes	Spirochaetia	Spirochaetales	Spirochaetaceae	Spirochaeta	+
Bacteria	Spirochaetes	Spirochaetia	Spirochaetales	Spirochaetaceae	Unclassified Spirochaetaceae		+
Bacteria	Unclassified Bacteria	Unclassified Bacteria	Unclassified Bacteria	Unclassified Bacteria	Unclassified Bacteria		+
Bacteria	Verrucomicrobia	Opitutae	Opitutales	Opitutaceae	Opitutus		+
Bacteria	Verrucomicrobia	Spartobacteria	Spartobacteria_genera_incertae_sedis	Unclassified Spartobacteria_genera_incertae_sedis	Unclassified Spartobacteria_genera_incertae_sedis		+
Bacteria	Verrucomicrobia	Spartobacteria	Unclassified Spartobacteria	Unclassified Spartobacteria	Unclassified Spartobacteria		+
Bacteria	Verrucomicrobia	Subdivision3	Subdivision3_genera_incertae_sedis	Unclassified Subdivision3_genera_incertae_sedis	Unclassified Subdivision3_genera_incertae_sedis		+
Bacteria	Verrucomicrobia	Subdivision3	Unclassified Subdivision3	Unclassified Subdivision3	Unclassified Subdivision3		+
Bacteria	Verrucomicrobia	Verrucomicrobiae	Verrucomicrobiales	Verrucomicrobiaceae	Prosthecobacter		+
Bacteria	Verrucomicrobia	Verrucomicrobiae	Verrucomicrobiales	Verrucomicrobiaceae	Roseimicrobium		+
Bacteria	Verrucomicrobia	Unclassified Verrucomicrobia	Unclassified Verrucomicrobia	Unclassified Verrucomicrobia	Unclassified Verrucomicrobia		+
Archaea	Euryarchaeota	Methanobacteria	Methanobacteriales	Methanobacteriaceae	Methanobacterium		+
Archaea	Euryarchaeota	Thermoplasmata	Methanomassiliicoccales	Methanomassiliicoccaceae	Methanomassiliicoccus		+
Archaea	Euryarchaeota	Unclassified Euryarchaeota	Unclassified Euryarchaeota	Unclassified Euryarchaeota	Unclassified Euryarchaeota	+
Archaea	Thaumarchaeota	Nitrososphaerales	Nitrososphaeraceae	Nitrososphaera	Nitrososphaera viennensis	+				+
Archaea	Thaumarchaeota	Nitrososphaerales	Nitrososphaeraceae	Nitrososphaera	Nitrososphaera_viennensis	+					+
Archaea	Thaumarchaeota	Unclassified Thaumarchaeota	Unclassified Thaumarchaeota	Unclassified Thaumarchaeota	Unclassified Thaumarchaeota	+
Archaea	Unclassified Archaea	Unclassified Archaea	Unclassified Archaea	Unclassified Archaea	Unclassified Archaea		+				+
Archaea	Woesearchaeota	Unclassified Woesearchaeota	Unclassified Woesearchaeota	Unclassified Woesearchaeota	Unclassified Woesearchaeota		+
Number of genera specifically enriched:						182	179	12	13	8	33

## Sheet: B_crop rotation_Fungi
fungal genera affected by crop rotation at the three different field locations
Phylum	Class	Order	Family	Genus	Italy		IRRI		Tarlac
					MM	RR	MR	RR	MR	RR
Ascomycota	Dothideomycetes	Capnodiales	Unclassified Capnodiales	Unclassified Capnodiales		+
Ascomycota	Dothideomycetes	Pleosporales	Cucurbitariaceae	Pyrenochaetopsis	+
Ascomycota	Dothideomycetes	Pleosporales	Sporormiaceae	Preussia						+
Ascomycota	Dothideomycetes	Pleosporales	Unclassified Pleosporales	Unclassified Pleosporales		+	+
Ascomycota	Dothideomycetes	Unclassified Dothideomycetes	Unclassified Dothideomycetes	Unclassified Dothideomycetes	+		+
Ascomycota	Eurotiomycetes	Chaetothyriales	Herpotrichiellaceae	Cladophialophora	+
Ascomycota	Eurotiomycetes	Chaetothyriales	Herpotrichiellaceae	Exophiala		+
Ascomycota	Eurotiomycetes	Eurotiales	Eurotiales_fam_Incertae_sedis	Thermomyces	+
Ascomycota	Eurotiomycetes	Eurotiales	Trichocomaceae	Paecilomyces	+
Ascomycota	Eurotiomycetes	Eurotiales	Trichocomaceae	Penicillium	+
Ascomycota	Eurotiomycetes	Eurotiales	Trichocomaceae	Talaromyces					+
Ascomycota	Eurotiomycetes	Onygenales	Arthrodermataceae	Arthroderma		+
Ascomycota	Eurotiomycetes	Onygenales	Arthrodermataceae	Trichophyton		+
Ascomycota	Eurotiomycetes	Onygenales	Onygenaceae	Aphanoascus	+
Ascomycota	Eurotiomycetes	Onygenales	Onygenaceae	Unclassified Onygenaceae		+
Ascomycota	Leotiomycetes	Helotiales	Helotiaceae	Neobulgaria	+
Ascomycota	Leotiomycetes	Helotiales	Helotiales_fam_Incertae_sedis	Cadophora	+
Ascomycota	Leotiomycetes	Helotiales	Helotiales_fam_Incertae_sedis	Scytalidium	+
Ascomycota	Leotiomycetes	Helotiales	Vibrisseaceae	Phialocephala	+
Ascomycota	Leotiomycetes	Helotiales	Unclassified Helotiales	Unclassified Helotiales	+
Ascomycota	Leotiomycetes	Leotiomycetes_ord_Incertae_sedis	Unclassified Leotiomycetes_ord_Incertae_sedis	Unclassified Leotiomycetes_ord_Incertae_sedis		+
Ascomycota	Leotiomycetes	Unclassified Leotiomycetes	Unclassified Leotiomycetes	Unclassified Leotiomycetes	+
Ascomycota	Orbiliomycetes	Orbiliales	Orbiliaceae	Arthrobotrys	+
Ascomycota	Orbiliomycetes	Orbiliales	Orbiliaceae	Monacrosporium		+
Ascomycota	Orbiliomycetes	Orbiliales	Orbiliaceae	Unclassified Orbiliaceae		+
Ascomycota	Pezizomycetes	Pezizales	Pezizaceae	Peziza		+
Ascomycota	Pezizomycetes	Pezizales	Pezizaceae	Unclassified Pezizaceae		+
Ascomycota	Pezizomycetes	Pezizales	Unclassified Pezizales	Unclassified Pezizales		+
Ascomycota	Pezizomycotina_cls_Incertae_sedis	Pezizomycotina_ord_Incertae_sedis	Pezizomycotina_fam_Incertae_sedis	Scolecobasidium	+
Ascomycota	Pezizomycotina_cls_Incertae_sedis	Pezizomycotina_ord_Incertae_sedis	Pezizomycotina_fam_Incertae_sedis	Unclassified Pezizomycotina_fam_Incertae_sedis	+
Ascomycota	Sordariomycetes	Chaetosphaeriales	Chaetosphaeriaceae	Chaetosphaeria	+
Ascomycota	Sordariomycetes	Chaetosphaeriales	Chaetosphaeriaceae	Unclassified Chaetosphaeriaceae	+
Ascomycota	Sordariomycetes	Chaetosphaeriales	Unclassified Chaetosphaeriales	Unclassified Chaetosphaeriales		+
Ascomycota	Sordariomycetes	Coniochaetales	Coniochaetaceae	Unclassified Coniochaetaceae		+
Ascomycota	Sordariomycetes	Coniochaetales	Unclassified Coniochaetales	Unclassified Coniochaetales		+
Ascomycota	Sordariomycetes	Diaporthales	Unclassified Diaporthales	Unclassified Diaporthales	+
Ascomycota	Sordariomycetes	Hypocreales	Bionectriaceae	Clonostachys	+
Ascomycota	Sordariomycetes	Hypocreales	Hypocreaceae	Trichoderma	+
Ascomycota	Sordariomycetes	Hypocreales	Hypocreales_fam_Incertae_sedis	Geosmithia	+
Ascomycota	Sordariomycetes	Hypocreales	Hypocreales_fam_Incertae_sedis	Unclassified Hypocreales_fam_Incertae_sedis	+
Ascomycota	Sordariomycetes	Hypocreales	Nectriaceae	Septofusidium	+
Ascomycota	Sordariomycetes	Hypocreales	Nectriaceae	Unclassified Nectriaceae	+
Ascomycota	Sordariomycetes	Melanosporales	Ceratostomataceae	Harzia	+
Ascomycota	Sordariomycetes	Sordariales	Chaetomiaceae	Chaetomidium		+
Ascomycota	Sordariomycetes	Sordariales	Chaetomiaceae	Humicola		+
Ascomycota	Sordariomycetes	Sordariales	Lasiosphaeriaceae	Unclassified Lasiosphaeriaceae		+
Ascomycota	Sordariomycetes	Sordariales	Sordariaceae	Unclassified Sordariaceae	+			+
Ascomycota	Sordariomycetes	Sordariales	Sordariales_fam_Incertae_sedis	Ramophialophora	+
Ascomycota	Sordariomycetes	Sordariales	Unclassified Sordariales	Unclassified Sordariales	+
Ascomycota	Sordariomycetes	Sordariomycetes_ord_Incertae_sedis	Sordariomycetes_fam_Incertae_sedis	Myrmecridium		+
Ascomycota	Sordariomycetes	Sordariomycetidae_ord_Incertae_sedis	Glomerellaceae	Colletotrichum	+
Ascomycota	Sordariomycetes	Trichosphaeriales	Trichosphaeriales_fam_Incertae_sedis	Unclassified Trichosphaeriales_fam_Incertae_sedis	+
Ascomycota	Sordariomycetes	Xylariales	Amphisphaeriaceae	Pestalotiopsis	+		+
Ascomycota	Sordariomycetes	Xylariales	Unclassified Xylariales	Unclassified Xylariales	+
Ascomycota	Sordariomycetes	Unclassified Sordariomycetes	Unclassified Sordariomycetes	Unclassified Sordariomycetes		+
Basidiomycota	Agaricomycetes	Agaricales	Agaricaceae	Unclassified Agaricaceae		+				+
Basidiomycota	Agaricomycetes	Agaricales	Entolomataceae	Entoloma	+
Basidiomycota	Agaricomycetes	Agaricales	Psathyrellaceae	Unclassified Psathyrellaceae		+
Basidiomycota	Agaricomycetes	Agaricales	Strophariaceae	Agrocybe	+
Basidiomycota	Agaricomycetes	Agaricales	Strophariaceae	Psilocybe	+
Basidiomycota	Agaricomycetes	Agaricales	Unclassified Agaricales	Unclassified Agaricales		+
Basidiomycota	Agaricomycetes	Auriculariales	Unclassified Auriculariales	Unclassified Auriculariales		+
Basidiomycota	Agaricomycetes	Cantharellales	Ceratobasidiaceae	Ceratorhiza	+
Basidiomycota	Agaricomycetes	Cantharellales	Ceratobasidiaceae	Thanatephorus		+
Basidiomycota	Agaricomycetes	Corticiales	Corticiaceae	Unclassified Corticiaceae	+
Basidiomycota	Agaricomycetes	Polyporales	Limnoperdaceae	Limnoperdon	+
Basidiomycota	Agaricomycetes	Polyporales	Unclassified Polyporales	Unclassified Polyporales					+
Basidiomycota	Agaricomycetes	Russulales	Stephanosporaceae	Unclassified Stephanosporaceae	+
Basidiomycota	Agaricomycetes	Russulales	Unclassified Russulales	Unclassified Russulales		+
Basidiomycota	Agaricomycetes	Sebacinales	Sebacinales_Group_B	Piriformospora		+
Basidiomycota	Agaricomycetes	Sebacinales	Sebacinales_Group_B	Unclassified Sebacinales_Group_B	+
Basidiomycota	Agaricomycetes	Sebacinales	Unclassified Sebacinales	Unclassified Sebacinales	+
Basidiomycota	Agaricomycetes	Trechisporales	Hydnodontaceae	Trechispora		+
Basidiomycota	Agaricomycetes	Trechisporales	Unclassified Trechisporales	Unclassified Trechisporales	+
Basidiomycota	Agaricostilbomycetes	Agaricostilbales	Chionosphaeraceae	Unclassified Chionosphaeraceae		+
Basidiomycota	Cystobasidiomycetes	Unclassified Cystobasidiomycetes	Unclassified Cystobasidiomycetes	Unclassified Cystobasidiomycetes		+
Basidiomycota	Exobasidiomycetes	Tilletiales	Tilletiaceae	Tilletia		+
Basidiomycota	Microbotryomycetes	Leucosporidiales	Unclassified Leucosporidiales	Unclassified Leucosporidiales		+
Basidiomycota	Microbotryomycetes	Sporidiobolales	Sporidiobolales_fam_Incertae_sedis	Rhodotorula						+
Basidiomycota	Microbotryomycetes	Unclassified Microbotryomycetes	Unclassified Microbotryomycetes	Unclassified Microbotryomycetes		+
Basidiomycota	Tremellomycetes	Cystofilobasidiales	Cystofilobasidiaceae	Mrakia	+
Basidiomycota	Tremellomycetes	Cystofilobasidiales	Cystofilobasidiaceae	Udeniomyces		+
Basidiomycota	Tremellomycetes	Cystofilobasidiales	Cystofilobasidiales_fam_Incertae_sedis	Mrakiella		+
Basidiomycota	Tremellomycetes	Tremellales	Tremellales_fam_Incertae_sedis	Auriculibuller	+
Basidiomycota	Tremellomycetes	Tremellales	Tremellales_fam_Incertae_sedis	Cryptococcus	+
Basidiomycota	Ustilaginomycetes	Ustilaginales	Ustilaginaceae	Ustilago	+
Chytridiomycota	Chytridiomycetes	Chytridiales	Chytridiaceae	Unclassified Chytridiaceae	+
Chytridiomycota	Chytridiomycetes	Chytridiales	Chytridiales_fam_Incertae_sedis	Delfinachytrium		+
Chytridiomycota	Chytridiomycetes	Rhizophydiales	Alphamycetaceae	Betamyces		+
Chytridiomycota	Chytridiomycetes	Rhizophydiales	Aquamycetaceae	Aquamyces		+
Chytridiomycota	Chytridiomycetes	Rhizophydiales	Rhizophydiaceae	Rhizophydium		+
Chytridiomycota	Unclassified Chytridiomycota	Unclassified Chytridiomycota	Unclassified Chytridiomycota	Unclassified Chytridiomycota		+
Chytridiomycota	Monoblepharidomycetes	Monoblepharidales	Unclassified Monoblepharidales	Unclassified Monoblepharidales	+
Glomeromycota	Glomeromycetes	Diversisporales	Acaulosporaceae	Entrophospora	+
Zygomycota	Mortierellomycotina_cls_Incertae_sedis	Mortierellales	Mortierellaceae	Mortierella	+
Zygomycota	Mortierellomycotina_cls_Incertae_sedis	Mortierellales	Mortierellaceae	Unclassified Mortierellaceae		+
Zygomycota	Mucoromycotina_cls_Incertae_sedis	Mucorales	Umbelopsidaceae	Umbelopsis	+
Unclassified Fungi	Unclassified Fungi	Unclassified Fungi	Unclassified Fungi	Unclassified Fungi	+
Number of genera specifically enriched:					53	41	3	1	2	3

## Sheet: C_crop rotation_compartment_Bac
bacterial and archaeal genera affected by crop rotation in the different compartments at the three different field locations
Domain	Phylum	Class	Order	Family	Genus	Italy				IRRI				Tarlac
						bulk soil		rhizosphere		bulk soil		rhizosphere		bulk soil		rhizosphere
						MM	RR	MM	RR	MR	RR	MR	RR	MR	RR	MR	RR
Bacteria	Acidobacteria	Acidobacteria_Gp1	Acidicapsa	Acidicapsa_borealis	Unclassified Acidicapsa_borealis	+
Bacteria	Acidobacteria	Acidobacteria_Gp1	Candidatus_Koribacter	Unclassified Candidatus_Koribacter	Unclassified Candidatus_Koribacter		+		+
Bacteria	Acidobacteria	Acidobacteria_Gp1	Edaphobacter	Edaphobacter_modestus	Unclassified Edaphobacter_modestus	+		+
Bacteria	Acidobacteria	Acidobacteria_Gp1	Gp1	Unclassified Gp1	Unclassified Gp1	+		+
Bacteria	Acidobacteria	Acidobacteria_Gp1	Granulicella	Unclassified Granulicella	Unclassified Granulicella	+		+
Bacteria	Acidobacteria	Acidobacteria_Gp1	Terriglobus	Unclassified Terriglobus	Unclassified Terriglobus	+		+
Bacteria	Acidobacteria	Acidobacteria_Gp1	Unclassified Acidobacteria_Gp1	Unclassified Acidobacteria_Gp1	Unclassified Acidobacteria_Gp1	+		+
Bacteria	Acidobacteria	Acidobacteria_Gp2	Gp2	Unclassified Gp2	Unclassified Gp2	+		+							+
Bacteria	Acidobacteria	Acidobacteria_Gp3	Candidatus_Solibacter	Unclassified Candidatus_Solibacter	Unclassified Candidatus_Solibacter		+
Bacteria	Acidobacteria	Acidobacteria_Gp3	Gp3	Unclassified Gp3	Unclassified Gp3	+		+
Bacteria	Acidobacteria	Acidobacteria_Gp3	Unclassified Acidobacteria_Gp3	Unclassified Acidobacteria_Gp3	Unclassified Acidobacteria_Gp3							+
Bacteria	Acidobacteria	Acidobacteria_Gp4	Aridibacter	Unclassified Aridibacter	Unclassified Aridibacter		+		+
Bacteria	Acidobacteria	Acidobacteria_Gp4	Blastocatella	Blastocatella_fastidiosa	Unclassified Blastocatella_fastidiosa				+
Bacteria	Acidobacteria	Acidobacteria_Gp4	Gp4	Unclassified Gp4	Unclassified Gp4		+		+
Bacteria	Acidobacteria	Acidobacteria_Gp4	Unclassified Acidobacteria_Gp4	Unclassified Acidobacteria_Gp4	Unclassified Acidobacteria_Gp4		+		+
Bacteria	Acidobacteria	Acidobacteria_Gp5	Gp5	Unclassified Gp5	Unclassified Gp5	+		+
Bacteria	Acidobacteria	Acidobacteria_Gp6	Gp6	Unclassified Gp6	Unclassified Gp6		+		+						+
Bacteria	Acidobacteria	Acidobacteria_Gp6	Unclassified Acidobacteria_Gp6	Unclassified Acidobacteria_Gp6	Unclassified Acidobacteria_Gp6						+
Bacteria	Acidobacteria	Acidobacteria_Gp7	Gp7	Unclassified Gp7	Unclassified Gp7		+		+
Bacteria	Acidobacteria	Acidobacteria_Gp7	Unclassified Acidobacteria_Gp7	Unclassified Acidobacteria_Gp7	Unclassified Acidobacteria_Gp7		+		+
Bacteria	Acidobacteria	Acidobacteria_Gp10	Gp10	Unclassified Gp10	Unclassified Gp10		+		+
Bacteria	Acidobacteria	Acidobacteria_Gp10	Unclassified Acidobacteria_Gp10	Unclassified Acidobacteria_Gp10	Unclassified Acidobacteria_Gp10		+		+
Bacteria	Acidobacteria	Acidobacteria_Gp11	Gp11	Unclassified Gp11	Unclassified Gp11		+
Bacteria	Acidobacteria	Acidobacteria_Gp12	Gp12	Unclassified Gp12	Unclassified Gp12		+
Bacteria	Acidobacteria	Acidobacteria_Gp13	Gp13	Unclassified Gp13	Unclassified Gp13	+		+
Bacteria	Acidobacteria	Acidobacteria_Gp13	Unclassified Acidobacteria_Gp13	Unclassified Acidobacteria_Gp13	Unclassified Acidobacteria_Gp13	+		+
Bacteria	Acidobacteria	Acidobacteria_Gp14	Gp14	Unclassified Gp14	Unclassified Gp14	+		+
Bacteria	Acidobacteria	Acidobacteria_Gp14	Unclassified Acidobacteria_Gp14	Unclassified Acidobacteria_Gp14	Unclassified Acidobacteria_Gp14	+		+
Bacteria	Acidobacteria	Acidobacteria_Gp15	Gp15	Unclassified Gp15	Unclassified Gp15		+		+
Bacteria	Acidobacteria	Acidobacteria_Gp16	Gp16	Unclassified Gp16	Unclassified Gp16		+		+						+		+
Bacteria	Acidobacteria	Acidobacteria_Gp16	Unclassified Acidobacteria_Gp16	Unclassified Acidobacteria_Gp16	Unclassified Acidobacteria_Gp16		+		+
Bacteria	Acidobacteria	Acidobacteria_Gp17	Gp17	Unclassified Gp17	Unclassified Gp17		+		+						+
Bacteria	Acidobacteria	Acidobacteria_Gp18	Gp18	Unclassified Gp18	Unclassified Gp18		+		+								+
Bacteria	Acidobacteria	Acidobacteria_Gp18	Unclassified Acidobacteria_Gp18	Unclassified Acidobacteria_Gp18	Unclassified Acidobacteria_Gp18		+		+
Bacteria	Acidobacteria	Acidobacteria_Gp25	Gp25	Unclassified Gp25	Unclassified Gp25		+		+
Bacteria	Acidobacteria	Holophagae	Holophagales	Holophagaceae	Geothrix	+
Bacteria	Acidobacteria	Unclassified Acidobacteria	Unclassified Acidobacteria	Unclassified Acidobacteria	Unclassified Acidobacteria		+		+
Bacteria	Actinobacteria	Actinobacteria	Acidimicrobiales	Acidimicrobineae_incertae_sedis	Aciditerrimonas	+
Bacteria	Actinobacteria	Actinobacteria	Acidimicrobiales	Iamiaceae	Aquihabitans		+		+
Bacteria	Actinobacteria	Actinobacteria	Acidimicrobiales	Iamiaceae	Unclassified Iamiaceae		+		+
Bacteria	Actinobacteria	Actinobacteria	Acidimicrobiales	Unclassified Acidimicrobiales	Unclassified Acidimicrobiales		+				+
Bacteria	Actinobacteria	Actinobacteria	Actinomycetales	Acidothermaceae	Acidothermus	+		+
Bacteria	Actinobacteria	Actinobacteria	Actinomycetales	Actinospicaceae	Actinospica	+		+
Bacteria	Actinobacteria	Actinobacteria	Actinomycetales	Bogoriellaceae	Georgenia	+
Bacteria	Actinobacteria	Actinobacteria	Actinomycetales	Brevibacteriaceae	Brevibacterium	+		+
Bacteria	Actinobacteria	Actinobacteria	Actinomycetales	Catenulisporaceae	Catenulispora	+		+
Bacteria	Actinobacteria	Actinobacteria	Actinomycetales	Cellulomonadaceae	Cellulomonas	+		+
Bacteria	Actinobacteria	Actinobacteria	Actinomycetales	Dermabacteraceae	Brachybacterium			+
Bacteria	Actinobacteria	Actinobacteria	Actinomycetales	Dermacoccaceae	Unclassified Dermacoccaceae	+		+
Bacteria	Actinobacteria	Actinobacteria	Actinomycetales	Dermatophilaceae	Unclassified Dermatophilaceae		+		+
Bacteria	Actinobacteria	Actinobacteria	Actinomycetales	Geodermatophilaceae	Blastococcus	+
Bacteria	Actinobacteria	Actinobacteria	Actinomycetales	Geodermatophilaceae	Unclassified Geodermatophilaceae	+
Bacteria	Actinobacteria	Actinobacteria	Actinomycetales	Glycomycetaceae	Glycomyces	+
Bacteria	Actinobacteria	Actinobacteria	Actinomycetales	Glycomycetaceae	Stackebrandtia			+
Bacteria	Actinobacteria	Actinobacteria	Actinomycetales	Intrasporangiaceae	Intrasporangium				+
Bacteria	Actinobacteria	Actinobacteria	Actinomycetales	Intrasporangiaceae	Oryzihumus		+
Bacteria	Actinobacteria	Actinobacteria	Actinomycetales	Intrasporangiaceae	Phycicoccus	+		+
Bacteria	Actinobacteria	Actinobacteria	Actinomycetales	Intrasporangiaceae	Terrabacter	+		+
Bacteria	Actinobacteria	Actinobacteria	Actinomycetales	Intrasporangiaceae	Unclassified Intrasporangiaceae						+
Bacteria	Actinobacteria	Actinobacteria	Actinomycetales	Kineosporiaceae	Angustibacter		+		+
Bacteria	Actinobacteria	Actinobacteria	Actinomycetales	Kineosporiaceae	Unclassified Kineosporiaceae	+		+
Bacteria	Actinobacteria	Actinobacteria	Actinomycetales	Microbacteriaceae	Agromyces	+		+
Bacteria	Actinobacteria	Actinobacteria	Actinomycetales	Microbacteriaceae	Gryllotalpicola	+		+
Bacteria	Actinobacteria	Actinobacteria	Actinomycetales	Microbacteriaceae	Leifsonia	+		+
Bacteria	Actinobacteria	Actinobacteria	Actinomycetales	Microbacteriaceae	Leucobacter			+
Bacteria	Actinobacteria	Actinobacteria	Actinomycetales	Microbacteriaceae	Microbacterium	+		+
Bacteria	Actinobacteria	Actinobacteria	Actinomycetales	Microbacteriaceae	Unclassified Microbacteriaceae			+
Bacteria	Actinobacteria	Actinobacteria	Actinomycetales	Micrococcaceae	Arthrobacter		+
Bacteria	Actinobacteria	Actinobacteria	Actinomycetales	Micrococcaceae	Sinomonas	+		+
Bacteria	Actinobacteria	Actinobacteria	Actinomycetales	Micromonosporaceae	Actinoplanes		+		+
Bacteria	Actinobacteria	Actinobacteria	Actinomycetales	Micromonosporaceae	Micromonospora	+
Bacteria	Actinobacteria	Actinobacteria	Actinomycetales	Micromonosporaceae	Rugosimonospora	+		+
Bacteria	Actinobacteria	Actinobacteria	Actinomycetales	Micromonosporaceae	Unclassified Micromonosporaceae		+
Bacteria	Actinobacteria	Actinobacteria	Actinomycetales	Micromonosporaceae	Virgisporangium		+
Bacteria	Actinobacteria	Actinobacteria	Actinomycetales	Mycobacteriaceae	Mycobacterium		+
Bacteria	Actinobacteria	Actinobacteria	Actinomycetales	Nocardiaceae	Nocardia	+		+
Bacteria	Actinobacteria	Actinobacteria	Actinomycetales	Nocardioidaceae	Kribbella			+
Bacteria	Actinobacteria	Actinobacteria	Actinomycetales	Nocardioidaceae	Marmoricola						+
Bacteria	Actinobacteria	Actinobacteria	Actinomycetales	Nocardioidaceae	Nocardioides		+				+
Bacteria	Actinobacteria	Actinobacteria	Actinomycetales	Promicromonosporaceae	Promicromonospora			+
Bacteria	Actinobacteria	Actinobacteria	Actinomycetales	Propionibacteriaceae	Propionibacterium			+
Bacteria	Actinobacteria	Actinobacteria	Actinomycetales	Propionibacteriaceae	Propionicimonas		+
Bacteria	Actinobacteria	Actinobacteria	Actinomycetales	Pseudonocardiaceae	Actinosynnema	+
Bacteria	Actinobacteria	Actinobacteria	Actinomycetales	Pseudonocardiaceae	Allokutzneria	+		+
Bacteria	Actinobacteria	Actinobacteria	Actinomycetales	Pseudonocardiaceae	Amycolatopsis	+		+
Bacteria	Actinobacteria	Actinobacteria	Actinomycetales	Pseudonocardiaceae	Pseudonocardia			+
Bacteria	Actinobacteria	Actinobacteria	Actinomycetales	Pseudonocardiaceae	Unclassified Pseudonocardiaceae	+		+
Bacteria	Actinobacteria	Actinobacteria	Actinomycetales	Streptomycetaceae	Streptomyces	+		+
Bacteria	Actinobacteria	Actinobacteria	Actinomycetales	Streptomycetaceae	Unclassified Streptomycetaceae	+		+
Bacteria	Actinobacteria	Actinobacteria	Actinomycetales	Streptosporangiaceae	Sphaerisporangium			+
Bacteria	Actinobacteria	Actinobacteria	Actinomycetales	Streptosporangiaceae	Streptosporangium			+
Bacteria	Actinobacteria	Actinobacteria	Actinomycetales	Streptosporangiaceae	Unclassified Streptosporangiaceae			+
Bacteria	Actinobacteria	Actinobacteria	Actinomycetales	Thermomonosporaceae	Actinoallomurus	+		+
Bacteria	Actinobacteria	Actinobacteria	Actinomycetales	Thermomonosporaceae	Actinocorallia			+
Bacteria	Actinobacteria	Actinobacteria	Actinomycetales	Thermomonosporaceae	Unclassified Thermomonosporaceae	+		+			+
Bacteria	Actinobacteria	Actinobacteria	Actinomycetales	Unclassified Actinomycetales	Unclassified Actinomycetales	+
Bacteria	Actinobacteria	Actinobacteria	Gaiellales	Gaiellaceae	Gaiella	+		+
Bacteria	Actinobacteria	Actinobacteria	Rubrobacterales	Rubrobacteraceae	Rubrobacter			+
Bacteria	Actinobacteria	Actinobacteria	Solirubrobacterales	Conexibacteraceae	Conexibacter	+		+						+
Bacteria	Actinobacteria	Actinobacteria	Solirubrobacterales	Solirubrobacteraceae	Solirubrobacter	+
Bacteria	Actinobacteria	Actinobacteria	Solirubrobacterales	Unclassified Solirubrobacterales	Unclassified Solirubrobacterales		+
Bacteria	Actinobacteria	Unclassified Actinobacteria	Unclassified Actinobacteria	Unclassified Actinobacteria	Unclassified Actinobacteria		+
Bacteria	Aminicenantes	Unclassified Aminicenantes	Unclassified Aminicenantes	Unclassified Aminicenantes	Unclassified Aminicenantes		+		+
Bacteria	Armatimonadetes	Armatimonadetes_gp2	Unclassified Armatimonadetes_gp2	Unclassified Armatimonadetes_gp2	Unclassified Armatimonadetes_gp2		+		+
Bacteria	Armatimonadetes	Armatimonadetes_gp4	Unclassified Armatimonadetes_gp4	Unclassified Armatimonadetes_gp4	Unclassified Armatimonadetes_gp4		+		+
Bacteria	Armatimonadetes	Armatimonadetes_gp5	Unclassified Armatimonadetes_gp5	Unclassified Armatimonadetes_gp5	Unclassified Armatimonadetes_gp5		+		+
Bacteria	Armatimonadetes	Armatimonadia	Armatimonadales	Armatimonadaceae	Armatimonas/Armatimonadetes_gp1	+		+
Bacteria	Armatimonadetes	Chthonomonadetes	Chthonomonadales	Chthonomonadaceae	Chthonomonas/Armatimonadetes_gp3		+		+
Bacteria	Armatimonadetes	Unclassified Armatimonadetes	Unclassified Armatimonadetes	Unclassified Armatimonadetes	Unclassified Armatimonadetes		+		+
Bacteria	Bacteroidetes	Bacteroidia	Bacteroidales	Prolixibacteraceae	Unclassified Prolixibacteraceae												+
Bacteria	Bacteroidetes	Bacteroidia	Bacteroidales	Unclassified Bacteroidales	Unclassified Bacteroidales		+
Bacteria	Bacteroidetes	Cytophagia	Cytophagales	Cytophagaceae	Adhaeribacter	+											+
Bacteria	Bacteroidetes	Cytophagia	Cytophagales	Cytophagaceae	Dyadobacter	+		+
Bacteria	Bacteroidetes	Cytophagia	Cytophagales	Cytophagaceae	Hymenobacter		+		+
Bacteria	Bacteroidetes	Cytophagia	Cytophagales	Cytophagaceae	Pontibacter	+
Bacteria	Bacteroidetes	Cytophagia	Cytophagales	Cytophagaceae	Rhodocytophaga	+
Bacteria	Bacteroidetes	Cytophagia	Cytophagales	Ohtaekwangia	Ohtaekwangia_kribbensis	+
Bacteria	Bacteroidetes	Flavobacteriia	Flavobacteriales	Cryomorphaceae	Fluviicola		+
Bacteria	Bacteroidetes	Flavobacteriia	Flavobacteriales	Flavobacteriaceae	Chryseobacterium	+		+
Bacteria	Bacteroidetes	Flavobacteriia	Flavobacteriales	Flavobacteriaceae	Cloacibacterium			+
Bacteria	Bacteroidetes	Flavobacteriia	Flavobacteriales	Flavobacteriaceae	Unclassified Flavobacteriaceae	+
Bacteria	Bacteroidetes	Sphingobacteriia	Sphingobacteriales	Chitinophagaceae	Arachidicoccus			+
Bacteria	Bacteroidetes	Sphingobacteriia	Sphingobacteriales	Chitinophagaceae	Chitinophaga			+
Bacteria	Bacteroidetes	Sphingobacteriia	Sphingobacteriales	Chitinophagaceae	Ferruginibacter		+		+
Bacteria	Bacteroidetes	Sphingobacteriia	Sphingobacteriales	Chitinophagaceae	Flavihumibacter	+
Bacteria	Bacteroidetes	Sphingobacteriia	Sphingobacteriales	Chitinophagaceae	Flavisolibacter		+		+
Bacteria	Bacteroidetes	Sphingobacteriia	Sphingobacteriales	Chitinophagaceae	Niabella	+
Bacteria	Bacteroidetes	Sphingobacteriia	Sphingobacteriales	Chitinophagaceae	Parasegetibacter				+
Bacteria	Bacteroidetes	Sphingobacteriia	Sphingobacteriales	Chitinophagaceae	Segetibacter		+		+
Bacteria	Bacteroidetes	Sphingobacteriia	Sphingobacteriales	Chitinophagaceae	Taibaiella			+
Bacteria	Bacteroidetes	Sphingobacteriia	Sphingobacteriales	Chitinophagaceae	Terrimonas		+
Bacteria	Bacteroidetes	Sphingobacteriia	Sphingobacteriales	Chitinophagaceae	Unclassified Chitinophagaceae	+		+
Bacteria	Bacteroidetes	Sphingobacteriia	Sphingobacteriales	Sphingobacteriaceae	Mucilaginibacter	+		+
Bacteria	Bacteroidetes	Sphingobacteriia	Sphingobacteriales	Sphingobacteriaceae	Olivibacter	+
Bacteria	Bacteroidetes	Sphingobacteriia	Sphingobacteriales	Sphingobacteriaceae	Parapedobacter	+
Bacteria	Bacteroidetes	Sphingobacteriia	Sphingobacteriales	Sphingobacteriaceae	Sphingobacterium	+		+
Bacteria	Bacteroidetes	Sphingobacteriia	Sphingobacteriales	Sphingobacteriaceae	Unclassified Sphingobacteriaceae	+		+
Bacteria	Bacteroidetes	Sphingobacteriia	Sphingobacteriales	Unclassified Sphingobacteriales	Unclassified Sphingobacteriales			+
Bacteria	Bacteroidetes	Unclassified Bacteroidetes	Unclassified Bacteroidetes	Unclassified Bacteroidetes	Unclassified Bacteroidetes		+		+
Bacteria	BRC1	BRC1_genera_incertae_sedis	Unclassified BRC1_genera_incertae_sedis	Unclassified BRC1_genera_incertae_sedis	Unclassified BRC1_genera_incertae_sedis		+		+
Bacteria	BRC1	Unclassified BRC1	Unclassified BRC1	Unclassified BRC1	Unclassified BRC1		+
Bacteria	candidate_division_WPS-1	WPS-1_genera_incertae_sedis	Unclassified WPS-1_genera_incertae_sedis	Unclassified WPS-1_genera_incertae_sedis	Unclassified WPS-1_genera_incertae_sedis	+		+
Bacteria	candidate_division_WPS-1	Unclassified candidate_division_WPS-1	Unclassified candidate_division_WPS-1	Unclassified candidate_division_WPS-1	Unclassified candidate_division_WPS-1	+			+	+
Bacteria	candidate_division_WPS-2	WPS-2_genera_incertae_sedis	Unclassified WPS-2_genera_incertae_sedis	Unclassified WPS-2_genera_incertae_sedis	Unclassified WPS-2_genera_incertae_sedis	+		+
Bacteria	candidate_division_WPS-2	Unclassified candidate_division_WPS-2	Unclassified candidate_division_WPS-2	Unclassified candidate_division_WPS-2	Unclassified candidate_division_WPS-2	+		+								+
Bacteria	Candidatus Saccharibacteria	Saccharibacteria genera incertae sedis	Unclassified Saccharibacteria genera incertae sedis	Unclassified Saccharibacteria genera incertae sedis	Unclassified Saccharibacteria genera incertae sedis		+		+
Bacteria	Chlamydiae	Chlamydiia	Chlamydiales	Parachlamydiaceae	Neochlamydia		+
Bacteria	Chlamydiae	Chlamydiia	Chlamydiales	Parachlamydiaceae	Parachlamydia			+
Bacteria	Chlamydiae	Chlamydiia	Chlamydiales	Unclassified Chlamydiales	Unclassified Chlamydiales	+
Bacteria	Chloroflexi	Anaerolineae	Anaerolineales	Anaerolineaceae	Anaerolinea		+		+						+		+
Bacteria	Chloroflexi	Anaerolineae	Anaerolineales	Anaerolineaceae	Leptolinea						+
Bacteria	Chloroflexi	Anaerolineae	Anaerolineales	Anaerolineaceae	Longilinea		+		+
Bacteria	Chloroflexi	Anaerolineae	Anaerolineales	Anaerolineaceae	Ornatilinea		+		+
Bacteria	Chloroflexi	Anaerolineae	Anaerolineales	Anaerolineaceae	Thermomarinilinea		+		+								+
Bacteria	Chloroflexi	Anaerolineae	Anaerolineales	Anaerolineaceae	Unclassified Anaerolineaceae		+		+
Bacteria	Chloroflexi	Caldilineae	Caldilineales	Caldilineaceae	Litorilinea		+		+
Bacteria	Chloroflexi	Caldilineae	Caldilineales	Caldilineaceae	Unclassified Caldilineaceae		+		+
Bacteria	Chloroflexi	Chloroflexia	Herpetosiphonales	Herpetosiphonaceae	Herpetosiphon	+			+
Bacteria	Chloroflexi	Ktedonobacteria	Ktedonobacterales	Ktedonobacteraceae	Ktedonobacter	+		+						+
Bacteria	Chloroflexi	Ktedonobacteria	Ktedonobacterales	Unclassified Ktedonobacterales	Unclassified Ktedonobacterales	+		+
Bacteria	Chloroflexi	Ktedonobacteria	Thermogemmatisporales	Thermogemmatisporaceae	Thermogemmatispora	+		+
Bacteria	Chloroflexi	Ktedonobacteria	Unclassified Ktedonobacteria	Unclassified Ktedonobacteria	Unclassified Ktedonobacteria	+
Bacteria	Chloroflexi	Thermomicrobia	Sphaerobacterales	Sphaerobacteraceae	Unclassified Sphaerobacteraceae	+
Bacteria	Chloroflexi	Thermomicrobia	Unclassified Thermomicrobia	Unclassified Thermomicrobia	Unclassified Thermomicrobia	+
Bacteria	Chloroflexi	Unclassified Chloroflexi	Unclassified Chloroflexi	Unclassified Chloroflexi	Unclassified Chloroflexi		+		+
Bacteria	Cyanobacteria/Chloroplast	Cyanobacteria	Family_I	GpI	Unclassified GpI		+		+
Bacteria	Cyanobacteria/Chloroplast	Cyanobacteria	Family_IV	GpIV	Unclassified GpIV			+
Bacteria	Cyanobacteria/Chloroplast	Cyanobacteria	Family_V	GpV	Unclassified GpV		+		+
Bacteria	Cyanobacteria/Chloroplast	Cyanobacteria	Family_XI	GpXI	Unclassified GpXI		+		+
Bacteria	Cyanobacteria/Chloroplast	Cyanobacteria	Unclassified Cyanobacteria	Unclassified Cyanobacteria	Unclassified Cyanobacteria		+		+
Bacteria	Cyanobacteria/Chloroplast	Unclassified Cyanobacteria/Chloroplast	Unclassified Cyanobacteria/Chloroplast	Unclassified Cyanobacteria/Chloroplast	Unclassified Cyanobacteria/Chloroplast	+		+
Bacteria	Deinococcus-Thermus	Deinococci	Deinococcales	Deinococcaceae	Deinococcus		+
Bacteria	Firmicutes	Bacilli	Bacillales	Alicyclobacillaceae	Alicyclobacillus	+
Bacteria	Firmicutes	Bacilli	Bacillales	Alicyclobacillaceae	Tumebacillus	+		+			+
Bacteria	Firmicutes	Bacilli	Bacillales	Alicyclobacillaceae	Unclassified Alicyclobacillaceae	+
Bacteria	Firmicutes	Bacilli	Bacillales	Bacillaceae_1	Bacillus	+		+
Bacteria	Firmicutes	Bacilli	Bacillales	Bacillaceae_1	Fictibacillus	+
Bacteria	Firmicutes	Bacilli	Bacillales	Bacillaceae_1	Unclassified Bacillaceae_1	+		+
Bacteria	Firmicutes	Bacilli	Bacillales	Bacillaceae_2	Virgibacillus	+
Bacteria	Firmicutes	Bacilli	Bacillales	Bacillaceae2	Unclassified Bacillaceae2	+		+
Bacteria	Firmicutes	Bacilli	Bacillales	Bacillales_Incertae_Sedis_XII	Exiguobacterium	+
Bacteria	Firmicutes	Bacilli	Bacillales	Paenibacillaceae_1	Cohnella	+		+
Bacteria	Firmicutes	Bacilli	Bacillales	Paenibacillaceae_1	Paenibacillus	+		+
Bacteria	Firmicutes	Bacilli	Bacillales	Paenibacillaceae_1	Thermobacillus						+
Bacteria	Firmicutes	Bacilli	Bacillales	Paenibacillaceae_1	Unclassified Paenibacillaceae_1	+
Bacteria	Firmicutes	Bacilli	Bacillales	Paenibacillaceae_2	Unclassified Paenibacillaceae_2	+		+						+
Bacteria	Firmicutes	Bacilli	Bacillales	Planococcaceae	Sporosarcina	+		+
Bacteria	Firmicutes	Bacilli	Bacillales	Planococcaceae	Unclassified Planococcaceae			+
Bacteria	Firmicutes	Bacilli	Bacillales	Sporolactobacillaceae	Sporolactobacillaceae_incertae_sedis	+
Bacteria	Firmicutes	Bacilli	Bacillales	Staphylococcaceae	Staphylococcus	+
Bacteria	Firmicutes	Bacilli	Bacillales	Thermoactinomycetaceae_1	Shimazuella	+
Bacteria	Firmicutes	Bacilli	Bacillales	Thermoactinomycetaceae_1	Thermoactinomyces	+
Bacteria	Firmicutes	Bacilli	Bacillales	Thermoactinomycetaceae_1	Unclassified Thermoactinomycetaceae_1	+
Bacteria	Firmicutes	Bacilli	Bacillales	Thermoactinomycetaceae_2	Planifilum	+
Bacteria	Firmicutes	Bacilli	Bacillales	Unclassified Bacillales	Unclassified Bacillales			+
Bacteria	Firmicutes	Clostridia	Clostridiales	Clostridiaceae_1	Clostridium sensu stricto		+		+		+
Bacteria	Firmicutes	Clostridia	Clostridiales	Clostridiaceae_1	Clostridium_sensu_stricto		+		+
Bacteria	Firmicutes	Clostridia	Clostridiales	Clostridiaceae_1	Fervidicella		+
Bacteria	Firmicutes	Clostridia	Clostridiales	Clostridiaceae_1	Unclassified Clostridiaceae_1		+					+
Bacteria	Firmicutes	Clostridia	Clostridiales	Heliobacteriaceae	Hydrogenispora		+		+	+		+		+
Bacteria	Firmicutes	Clostridia	Clostridiales	Lachnospiraceae	Cellulosilyticum						+
Bacteria	Firmicutes	Clostridia	Clostridiales	Lachnospiraceae	Unclassified Lachnospiraceae						+
Bacteria	Firmicutes	Clostridia	Clostridiales	Peptococcaceae_1	Unclassified Peptococcaceae_1	+
Bacteria	Firmicutes	Clostridia	Clostridiales	Peptococcaceae_2	Desulfotomaculum		+
Bacteria	Firmicutes	Clostridia	Clostridiales	Peptococcaceae_2	Pelotomaculum		+		+
Bacteria	Firmicutes	Clostridia	Clostridiales	Peptococcaceae_2	Unclassified Peptococcaceae_2		+
Bacteria	Firmicutes	Clostridia	Clostridiales	Peptostreptococcaceae	Sporacetigenium		+
Bacteria	Firmicutes	Clostridia	Clostridiales	Ruminococcaceae	Clostridium_III		+		+
Bacteria	Firmicutes	Clostridia	Clostridiales	Ruminococcaceae	Sporobacter		+
Bacteria	Firmicutes	Clostridia	Clostridiales	Ruminococcaceae	Unclassified Ruminococcaceae		+		+
Bacteria	Firmicutes	Clostridia	Clostridiales	Syntrophomonadaceae	Syntrophomonas		+		+
Bacteria	Firmicutes	Clostridia	Clostridiales	Syntrophomonadaceae	Unclassified Syntrophomonadaceae		+
Bacteria	Firmicutes	Clostridia	Clostridiales	Unclassified Clostridiales	Unclassified Clostridiales		+		+			+
Bacteria	Firmicutes	Negativicutes	Selenomonadales	Veillonellaceae	Propionispira		+		+		+
Bacteria	Firmicutes	Negativicutes	Selenomonadales	Veillonellaceae	Sporomusa		+		+			+
Bacteria	Firmicutes	Negativicutes	Selenomonadales	Veillonellaceae	Unclassified Veillonellaceae		+		+
Bacteria	Firmicutes	Unclassified Firmicutes	Unclassified Firmicutes	Unclassified Firmicutes	Unclassified Firmicutes		+		+
Bacteria	Gemmatimonadetes	Gemmatimonadetes	Gemmatimonadales	Gemmatimonadaceae	Gemmatimonas		+		+					+
Bacteria	Hydrogenedentes	Unclassified Hydrogenedentes	Unclassified Hydrogenedentes	Unclassified Hydrogenedentes	Unclassified Hydrogenedentes		+
Bacteria	Ignavibacteriae	Ignavibacteria	Ignavibacteriales	Ignavibacteriaceae	Ignavibacterium		+		+						+
Bacteria	Ignavibacteriae	Ignavibacteria	Ignavibacteriales	Ignavibacteriaceae	Melioribacter		+
Bacteria	Ignavibacteriae	Ignavibacteria	Ignavibacteriales	Ignavibacteriaceae	Unclassified Ignavibacteriaceae		+		+
Bacteria	Latescibacteria	Latescibacteria_genera_incertae_sedis	Unclassified Latescibacteria_genera_incertae_sedis	Unclassified Latescibacteria_genera_incertae_sedis	Unclassified Latescibacteria_genera_incertae_sedis		+		+
Bacteria	Latescibacteria	Unclassified Latescibacteria	Unclassified Latescibacteria	Unclassified Latescibacteria	Unclassified Latescibacteria		+		+						+
Bacteria	Microgenomates	Microgenomates_genera_incertae_sedis	Unclassified Microgenomates_genera_incertae_sedis	Unclassified Microgenomates_genera_incertae_sedis	Unclassified Microgenomates_genera_incertae_sedis		+		+
Bacteria	Microgenomates	Unclassified Microgenomates	Unclassified Microgenomates	Unclassified Microgenomates	Unclassified Microgenomates		+								+
Bacteria	Nitrospirae	Nitrospira	Nitrospirales	Nitrospiraceae	Nitrospira		+		+
Bacteria	Nitrospirae	Nitrospira	Nitrospirales	Nitrospiraceae	Thermodesulfovibrio		+
Bacteria	Nitrospirae	Nitrospira	Nitrospirales	Nitrospiraceae	Unclassified Nitrospiraceae	+		+
Bacteria	Parcubacteria	Parcubacteria_genera_incertae_sedis	Unclassified Parcubacteria_genera_incertae_sedis	Unclassified Parcubacteria_genera_incertae_sedis	Unclassified Parcubacteria_genera_incertae_sedis		+		+
Bacteria	Parcubacteria	Unclassified Parcubacteria	Unclassified Parcubacteria	Unclassified Parcubacteria	Unclassified Parcubacteria		+
Bacteria	Planctomycetes	Phycisphaerae	Tepidisphaerales	Tepidisphaeraceae	Tepidisphaera		+
Bacteria	Planctomycetes	Planctomycetia	Planctomycetales	Planctomycetaceae	Gemmata	+		+
Bacteria	Planctomycetes	Planctomycetia	Planctomycetales	Planctomycetaceae	Pirellula										+
Bacteria	Planctomycetes	Planctomycetia	Planctomycetales	Planctomycetaceae	Planctomicrobium	+
Bacteria	Planctomycetes	Planctomycetia	Planctomycetales	Planctomycetaceae	Rubinisphaera	+
Bacteria	Planctomycetes	Planctomycetia	Planctomycetales	Planctomycetaceae	Thermogutta		+		+
Bacteria	Planctomycetes	Planctomycetia	Planctomycetales	Planctomycetaceae	Unclassified Planctomycetaceae	+
Bacteria	Planctomycetes	Planctomycetia	Planctomycetales	Planctomycetaceae	Zavarzinella		+		+
Bacteria	Proteobacteria	Alphaproteobacteria	Alphaproteobacteria_incertae_sedis	Rhizomicrobium	Rhizomicrobium_electricum			+
Bacteria	Proteobacteria	Alphaproteobacteria	Alphaproteobacteria_incertae_sedis	Unclassified Alphaproteobacteria_incertae_sedis	Unclassified Alphaproteobacteria_incertae_sedis	+		+
Bacteria	Proteobacteria	Alphaproteobacteria	Caulobacterales	Caulobacteraceae	Brevundimonas	+		+
Bacteria	Proteobacteria	Alphaproteobacteria	Caulobacterales	Caulobacteraceae	Caulobacter		+		+
Bacteria	Proteobacteria	Alphaproteobacteria	Caulobacterales	Caulobacteraceae	Phenylobacterium			+
Bacteria	Proteobacteria	Alphaproteobacteria	Caulobacterales	Caulobacteraceae	Unclassified Caulobacteraceae	+		+
Bacteria	Proteobacteria	Alphaproteobacteria	Rhizobiales	Aurantimonadaceae	Aureimonas			+
Bacteria	Proteobacteria	Alphaproteobacteria	Rhizobiales	Beijerinckiaceae	Unclassified Beijerinckiaceae	+		+
Bacteria	Proteobacteria	Alphaproteobacteria	Rhizobiales	Bradyrhizobiaceae	Bosea	+		+
Bacteria	Proteobacteria	Alphaproteobacteria	Rhizobiales	Bradyrhizobiaceae	Rhodopseudomonas	+		+
Bacteria	Proteobacteria	Alphaproteobacteria	Rhizobiales	Bradyrhizobiaceae	Unclassified Bradyrhizobiaceae	+		+
Bacteria	Proteobacteria	Alphaproteobacteria	Rhizobiales	Brucellaceae	Ochrobactrum			+
Bacteria	Proteobacteria	Alphaproteobacteria	Rhizobiales	Hyphomicrobiaceae	Devosia	+		+
Bacteria	Proteobacteria	Alphaproteobacteria	Rhizobiales	Hyphomicrobiaceae	Hyphomicrobium		+	+
Bacteria	Proteobacteria	Alphaproteobacteria	Rhizobiales	Hyphomicrobiaceae	Pedomicrobium		+
Bacteria	Proteobacteria	Alphaproteobacteria	Rhizobiales	Hyphomicrobiaceae	Rhodomicrobium		+
Bacteria	Proteobacteria	Alphaproteobacteria	Rhizobiales	Hyphomicrobiaceae	Unclassified Hyphomicrobiaceae		+		+
Bacteria	Proteobacteria	Alphaproteobacteria	Rhizobiales	Methylobacteriaceae	Methylobacterium	+		+
Bacteria	Proteobacteria	Alphaproteobacteria	Rhizobiales	Methylobacteriaceae	Microvirga	+
Bacteria	Proteobacteria	Alphaproteobacteria	Rhizobiales	Methylocystaceae	Unclassified Methylocystaceae		+		+
Bacteria	Proteobacteria	Alphaproteobacteria	Rhizobiales	Rhizobiaceae	Rhizobium	+		+
Bacteria	Proteobacteria	Alphaproteobacteria	Rhizobiales	Rhizobiaceae	Unclassified Rhizobiaceae	+		+
Bacteria	Proteobacteria	Alphaproteobacteria	Rhizobiales	Rhizobiales_incertae_sedis	Alsobacter		+		+
Bacteria	Proteobacteria	Alphaproteobacteria	Rhizobiales	Rhodobiaceae	Unclassified Rhodobiaceae	+
Bacteria	Proteobacteria	Alphaproteobacteria	Rhizobiales	Roseiarcaceae	Roseiarcus	+		+
Bacteria	Proteobacteria	Alphaproteobacteria	Rhizobiales	Unclassified Rhizobiales	Unclassified Rhizobiales		+		+
Bacteria	Proteobacteria	Alphaproteobacteria	Rhizobiales	Xanthobacteraceae	Ancylobacter	+
Bacteria	Proteobacteria	Alphaproteobacteria	Rhizobiales	Xanthobacteraceae	Pseudolabrys		+		+
Bacteria	Proteobacteria	Alphaproteobacteria	Rhizobiales	Xanthobacteraceae	Unclassified Xanthobacteraceae		+
Bacteria	Proteobacteria	Alphaproteobacteria	Rhodobacterales	Rhodobacteraceae	Paracoccus	+
Bacteria	Proteobacteria	Alphaproteobacteria	Rhodobacterales	Rhodobacteraceae	Rhodobacter	+
Bacteria	Proteobacteria	Alphaproteobacteria	Rhodobacterales	Rhodobacteraceae	Rubellimicrobium			+
Bacteria	Proteobacteria	Alphaproteobacteria	Rhodospirillales	Acetobacteraceae	Acidicaldus	+
Bacteria	Proteobacteria	Alphaproteobacteria	Rhodospirillales	Acetobacteraceae	Acidisoma	+
Bacteria	Proteobacteria	Alphaproteobacteria	Rhodospirillales	Acetobacteraceae	Belnapia		+		+
Bacteria	Proteobacteria	Alphaproteobacteria	Rhodospirillales	Acetobacteraceae	Rhodopila	+		+
Bacteria	Proteobacteria	Alphaproteobacteria	Rhodospirillales	Acetobacteraceae	Unclassified Acetobacteraceae	+		+
Bacteria	Proteobacteria	Alphaproteobacteria	Rhodospirillales	Reyranella	Unclassified Reyranella	+		+
Bacteria	Proteobacteria	Alphaproteobacteria	Rhodospirillales	Rhodospirillaceae	Dongia		+		+
Bacteria	Proteobacteria	Alphaproteobacteria	Rhodospirillales	Rhodospirillaceae	Lacibacterium		+		+
Bacteria	Proteobacteria	Alphaproteobacteria	Rhodospirillales	Rhodospirillaceae	Skermanella		+		+
Bacteria	Proteobacteria	Alphaproteobacteria	Rhodospirillales	Rhodospirillaceae	Telmatospirillum	+
Bacteria	Proteobacteria	Alphaproteobacteria	Rhodospirillales	Rhodospirillaceae	Unclassified Rhodospirillaceae	+		+
Bacteria	Proteobacteria	Alphaproteobacteria	Rhodospirillales	Unclassified Rhodospirillales	Unclassified Rhodospirillales	+		+
Bacteria	Proteobacteria	Alphaproteobacteria	Rickettsiales	Rickettsiaceae	Rickettsia	+		+
Bacteria	Proteobacteria	Alphaproteobacteria	Sphingomonadales	Erythrobacteraceae	Altererythrobacter			+
Bacteria	Proteobacteria	Alphaproteobacteria	Sphingomonadales	Erythrobacteraceae	Porphyrobacter		+
Bacteria	Proteobacteria	Alphaproteobacteria	Sphingomonadales	Erythrobacteraceae	Unclassified Erythrobacteraceae			+
Bacteria	Proteobacteria	Alphaproteobacteria	Sphingomonadales	Sphingomonadaceae	Rhizorhabdus		+		+
Bacteria	Proteobacteria	Alphaproteobacteria	Sphingomonadales	Sphingomonadaceae	Sphingobium	+		+
Bacteria	Proteobacteria	Alphaproteobacteria	Sphingomonadales	Sphingomonadaceae	Sphingomonas			+
Bacteria	Proteobacteria	Alphaproteobacteria	Sphingomonadales	Sphingomonadaceae	Sphingopyxis	+		+
Bacteria	Proteobacteria	Alphaproteobacteria	Sphingomonadales	Sphingomonadaceae	Sphingorhabdus			+
Bacteria	Proteobacteria	Alphaproteobacteria	Sphingomonadales	Sphingomonadaceae	Unclassified Sphingomonadaceae	+		+
Bacteria	Proteobacteria	Alphaproteobacteria	Unclassified Alphaproteobacteria	Unclassified Alphaproteobacteria	Unclassified Alphaproteobacteria	+		+
Bacteria	Proteobacteria	Betaproteobacteria	Burkholderiales	Alcaligenaceae	Advenella			+
Bacteria	Proteobacteria	Betaproteobacteria	Burkholderiales	Alcaligenaceae	Castellaniella	+		+
Bacteria	Proteobacteria	Betaproteobacteria	Burkholderiales	Burkholderiaceae	Burkholderia	+		+
Bacteria	Proteobacteria	Betaproteobacteria	Burkholderiales	Burkholderiaceae	Cupriavidus			+
Bacteria	Proteobacteria	Betaproteobacteria	Burkholderiales	Burkholderiaceae	Limnobacter			+
Bacteria	Proteobacteria	Betaproteobacteria	Burkholderiales	Burkholderiaceae	Polynucleobacter	+
Bacteria	Proteobacteria	Betaproteobacteria	Burkholderiales	Burkholderiaceae	Ralstonia	+		+
Bacteria	Proteobacteria	Betaproteobacteria	Burkholderiales	Comamonadaceae	Comamonas		+	+
Bacteria	Proteobacteria	Betaproteobacteria	Burkholderiales	Comamonadaceae	Ramlibacter		+
Bacteria	Proteobacteria	Betaproteobacteria	Burkholderiales	Comamonadaceae	Unclassified Comamonadaceae		+
Bacteria	Proteobacteria	Betaproteobacteria	Burkholderiales	Oxalobacteraceae	Pseudoduganella		+		+
Bacteria	Proteobacteria	Betaproteobacteria	Burkholderiales	Oxalobacteraceae	Unclassified Oxalobacteraceae		+		+
Bacteria	Proteobacteria	Betaproteobacteria	Hydrogenophilales	Hydrogenophilaceae	Thiobacillus		+		+						+
Bacteria	Proteobacteria	Betaproteobacteria	Methylophilales	Methylophilaceae	Methylophilus			+
Bacteria	Proteobacteria	Betaproteobacteria	Nitrosomonadales	Nitrosomonadaceae	Nitrosospira			+
Bacteria	Proteobacteria	Betaproteobacteria	Rhodocyclales	Rhodocyclaceae	Unclassified Rhodocyclaceae		+		+
Bacteria	Proteobacteria	Betaproteobacteria	Unclassified Betaproteobacteria	Unclassified Betaproteobacteria	Unclassified Betaproteobacteria			+
Bacteria	Proteobacteria	Deltaproteobacteria	Bdellovibrionales	Bacteriovoracaceae	Bacteriovorax		+
Bacteria	Proteobacteria	Deltaproteobacteria	Bdellovibrionales	Bacteriovoracaceae	Peredibacter		+		+
Bacteria	Proteobacteria	Deltaproteobacteria	Bdellovibrionales	Bacteriovoracaceae	Unclassified Bacteriovoracaceae		+
Bacteria	Proteobacteria	Deltaproteobacteria	Bdellovibrionales	Bdellovibrionaceae	Bdellovibrio		+
Bacteria	Proteobacteria	Deltaproteobacteria	Bdellovibrionales	Bdellovibrionaceae	Vampirovibrio				+
Bacteria	Proteobacteria	Deltaproteobacteria	Deltaproteobacteria_incertae_sedis	Unclassified Deltaproteobacteria_incertae_sedis	Unclassified Deltaproteobacteria_incertae_sedis		+		+
Bacteria	Proteobacteria	Deltaproteobacteria	Desulfobacterales	Desulfobacteraceae	Desulfatiglans		+		+
Bacteria	Proteobacteria	Deltaproteobacteria	Desulfobacterales	Desulfobacteraceae	Unclassified Desulfobacteraceae		+		+
Bacteria	Proteobacteria	Deltaproteobacteria	Desulfobacterales	Desulfobulbaceae	Desulfobulbus		+								+
Bacteria	Proteobacteria	Deltaproteobacteria	Desulfobacterales	Desulfobulbaceae	Unclassified Desulfobulbaceae		+		+
Bacteria	Proteobacteria	Deltaproteobacteria	Desulfovibrionales	Desulfovibrionaceae	Desulfovibrio		+
Bacteria	Proteobacteria	Deltaproteobacteria	Desulfuromonadales	Desulfuromonadaceae	Desulfuromonas						+
Bacteria	Proteobacteria	Deltaproteobacteria	Desulfuromonadales	Desulfuromonadaceae	Unclassified Desulfuromonadaceae						+				+
Bacteria	Proteobacteria	Deltaproteobacteria	Desulfuromonadales	Geobacteraceae	Geobacter		+		+						+		+
Bacteria	Proteobacteria	Deltaproteobacteria	Desulfuromonadales	Unclassified Desulfuromonadales	Unclassified Desulfuromonadales		+								+
Bacteria	Proteobacteria	Deltaproteobacteria	Myxococcales	Cystobacteraceae	Anaeromyxobacter		+		+
Bacteria	Proteobacteria	Deltaproteobacteria	Myxococcales	Cystobacteraceae	Cystobacter		+
Bacteria	Proteobacteria	Deltaproteobacteria	Myxococcales	Cystobacteraceae	Unclassified Cystobacteraceae		+		+
Bacteria	Proteobacteria	Deltaproteobacteria	Myxococcales	Haliangiaceae	Haliangium		+
Bacteria	Proteobacteria	Deltaproteobacteria	Myxococcales	Labilitrichaceae	Labilithrix		+		+
Bacteria	Proteobacteria	Deltaproteobacteria	Myxococcales	Myxococcaceae	Aggregicoccus		+
Bacteria	Proteobacteria	Deltaproteobacteria	Myxococcales	Myxococcaceae	Myxococcus	+		+
Bacteria	Proteobacteria	Deltaproteobacteria	Myxococcales	Nannocystaceae	Enhygromyxa		+		+
Bacteria	Proteobacteria	Deltaproteobacteria	Myxococcales	Nannocystaceae	Unclassified Nannocystaceae				+
Bacteria	Proteobacteria	Deltaproteobacteria	Myxococcales	Polyangiaceae	Chondromyces		+
Bacteria	Proteobacteria	Deltaproteobacteria	Myxococcales	Polyangiaceae	Minicystis		+		+
Bacteria	Proteobacteria	Deltaproteobacteria	Myxococcales	Polyangiaceae	Unclassified Polyangiaceae		+		+		+
Bacteria	Proteobacteria	Deltaproteobacteria	Myxococcales	Unclassified Myxococcales	Unclassified Myxococcales		+
Bacteria	Proteobacteria	Deltaproteobacteria	Myxococcales	Vulgatibacteraceae	Vulgatibacter	+
Bacteria	Proteobacteria	Deltaproteobacteria	Syntrophobacterales	Syntrophaceae	Desulfobacca		+		+		+
Bacteria	Proteobacteria	Deltaproteobacteria	Syntrophobacterales	Syntrophaceae	Desulfomonile		+		+
Bacteria	Proteobacteria	Deltaproteobacteria	Syntrophobacterales	Syntrophaceae	Unclassified Syntrophaceae		+		+
Bacteria	Proteobacteria	Deltaproteobacteria	Syntrophobacterales	Syntrophobacteraceae	Desulfovirga		+		+
Bacteria	Proteobacteria	Deltaproteobacteria	Syntrophobacterales	Syntrophobacteraceae	Syntrophobacter		+		+						+
Bacteria	Proteobacteria	Deltaproteobacteria	Syntrophobacterales	Syntrophobacteraceae	Unclassified Syntrophobacteraceae		+		+						+		+
Bacteria	Proteobacteria	Deltaproteobacteria	Syntrophorhabdaceae	Syntrophorhabdus	Syntrophorhabdus_aromaticivorans		+
Bacteria	Proteobacteria	Deltaproteobacteria	Unclassified Deltaproteobacteria	Unclassified Deltaproteobacteria	Unclassified Deltaproteobacteria		+		+						+
Bacteria	Proteobacteria	Gammaproteobacteria	Aeromonadales	Aeromonadaceae	Aeromonas	+
Bacteria	Proteobacteria	Gammaproteobacteria	Chromatiales	Chromatiaceae	Nitrosococcus	+
Bacteria	Proteobacteria	Gammaproteobacteria	Enterobacteriales	Enterobacteriaceae	Escherichia/Shigella			+
Bacteria	Proteobacteria	Gammaproteobacteria	Enterobacteriales	Enterobacteriaceae	Kosakonia	+
Bacteria	Proteobacteria	Gammaproteobacteria	Enterobacteriales	Enterobacteriaceae	Unclassified Enterobacteriaceae	+		+
Bacteria	Proteobacteria	Gammaproteobacteria	Gammaproteobacteria_incertae_sedis	Unclassified Gammaproteobacteria_incertae_sedis	Unclassified Gammaproteobacteria_incertae_sedis	+
Bacteria	Proteobacteria	Gammaproteobacteria	Legionellales	Coxiellaceae	Coxiella	+
Bacteria	Proteobacteria	Gammaproteobacteria	Legionellales	Coxiellaceae	Diplorickettsia	+
Bacteria	Proteobacteria	Gammaproteobacteria	Legionellales	Legionellaceae	Legionella		+
Bacteria	Proteobacteria	Gammaproteobacteria	Methylococcales	Methylococcaceae	Methylocaldum		+
Bacteria	Proteobacteria	Gammaproteobacteria	Methylococcales	Methylococcaceae	Unclassified Methylococcaceae		+		+		+				+
Bacteria	Proteobacteria	Gammaproteobacteria	Oceanospirillales	Halomonadaceae	Salinicola	+		+
Bacteria	Proteobacteria	Gammaproteobacteria	Pseudomonadales	Moraxellaceae	Acinetobacter	+
Bacteria	Proteobacteria	Gammaproteobacteria	Pseudomonadales	Moraxellaceae	Unclassified Moraxellaceae			+
Bacteria	Proteobacteria	Gammaproteobacteria	Pseudomonadales	Pseudomonadaceae	Cellvibrio		+		+
Bacteria	Proteobacteria	Gammaproteobacteria	Unclassified Gammaproteobacteria	Unclassified Gammaproteobacteria	Unclassified Gammaproteobacteria	+		+
Bacteria	Proteobacteria	Gammaproteobacteria	Xanthomonadales	Sinobacteraceae	Alkanibacter	+
Bacteria	Proteobacteria	Gammaproteobacteria	Xanthomonadales	Sinobacteraceae	Nevskia			+
Bacteria	Proteobacteria	Gammaproteobacteria	Xanthomonadales	Sinobacteraceae	Panacagrimonas		+
Bacteria	Proteobacteria	Gammaproteobacteria	Xanthomonadales	Sinobacteraceae	Povalibacter		+
Bacteria	Proteobacteria	Gammaproteobacteria	Xanthomonadales	Sinobacteraceae	Steroidobacter			+
Bacteria	Proteobacteria	Gammaproteobacteria	Xanthomonadales	Sinobacteraceae	Unclassified Sinobacteraceae	+
Bacteria	Proteobacteria	Gammaproteobacteria	Xanthomonadales	Xanthomonadaceae	Arenimonas		+		+
Bacteria	Proteobacteria	Gammaproteobacteria	Xanthomonadales	Xanthomonadaceae	Chiayiivirga				+
Bacteria	Proteobacteria	Gammaproteobacteria	Xanthomonadales	Xanthomonadaceae	Dokdonella		+		+
Bacteria	Proteobacteria	Gammaproteobacteria	Xanthomonadales	Xanthomonadaceae	Dyella	+		+
Bacteria	Proteobacteria	Gammaproteobacteria	Xanthomonadales	Xanthomonadaceae	Luteimonas	+		+
Bacteria	Proteobacteria	Gammaproteobacteria	Xanthomonadales	Xanthomonadaceae	Lysobacter		+		+
Bacteria	Proteobacteria	Gammaproteobacteria	Xanthomonadales	Xanthomonadaceae	Pseudoxanthomonas	+
Bacteria	Proteobacteria	Gammaproteobacteria	Xanthomonadales	Xanthomonadaceae	Rhodanobacter	+		+
Bacteria	Proteobacteria	Gammaproteobacteria	Xanthomonadales	Xanthomonadaceae	Rudaea	+
Bacteria	Proteobacteria	Gammaproteobacteria	Xanthomonadales	Xanthomonadaceae	Stenotrophomonas			+
Bacteria	Proteobacteria	Gammaproteobacteria	Xanthomonadales	Xanthomonadaceae	Thermomonas	+
Bacteria	Proteobacteria	Gammaproteobacteria	Xanthomonadales	Xanthomonadaceae	Unclassified Xanthomonadaceae	+		+
Bacteria	Proteobacteria	Gammaproteobacteria	Xanthomonadales	Xanthomonadaceae	Xanthomonas	+		+
Bacteria	Proteobacteria	Oligoflexia	Oligoflexales	Oligoflexaceae	Oligoflexus		+
Bacteria	Proteobacteria	Unclassified Proteobacteria	Unclassified Proteobacteria	Unclassified Proteobacteria	Unclassified Proteobacteria			+
Bacteria	Spirochaetes	Spirochaetia	Spirochaetales	Spirochaetaceae	Spirochaeta	+
Bacteria	Spirochaetes	Spirochaetia	Spirochaetales	Spirochaetaceae	Unclassified Spirochaetaceae		+		+
Bacteria	Verrucomicrobia	Opitutae	Opitutales	Opitutaceae	Opitutus		+
Bacteria	Verrucomicrobia	Spartobacteria	Spartobacteria_genera_incertae_sedis	Unclassified Spartobacteria_genera_incertae_sedis	Unclassified Spartobacteria_genera_incertae_sedis		+		+
Bacteria	Verrucomicrobia	Spartobacteria	Unclassified Spartobacteria	Unclassified Spartobacteria	Unclassified Spartobacteria				+
Bacteria	Verrucomicrobia	Subdivision3	Subdivision3_genera_incertae_sedis	Unclassified Subdivision3_genera_incertae_sedis	Unclassified Subdivision3_genera_incertae_sedis		+					+
Bacteria	Verrucomicrobia	Subdivision3	Unclassified Subdivision3	Unclassified Subdivision3	Unclassified Subdivision3		+
Bacteria	Verrucomicrobia	Verrucomicrobiae	Verrucomicrobiales	Verrucomicrobiaceae	Roseimicrobium				+
Bacteria	Verrucomicrobia	Verrucomicrobiae	Verrucomicrobiales	Verrucomicrobiaceae	Unclassified Verrucomicrobiaceae	+
Bacteria	Verrucomicrobia	Verrucomicrobiae	Verrucomicrobiales	Verrucomicrobiaceae	Verrucomicrobium	+
Bacteria	Verrucomicrobia	Unclassified Verrucomicrobia	Unclassified Verrucomicrobia	Unclassified Verrucomicrobia	Unclassified Verrucomicrobia		+		+
Bacteria	Unclassified Bacteria	Unclassified Bacteria	Unclassified Bacteria	Unclassified Bacteria	Unclassified Bacteria		+		+
Archaea	Euryarchaeota	Methanobacteria	Methanobacteriales	Methanobacteriaceae	Methanobacterium		+		+
Archaea	Euryarchaeota	Thermoplasmata	Methanomassiliicoccales	Methanomassiliicoccaceae	Methanomassiliicoccus		+		+
Archaea	Euryarchaeota	Unclassified Euryarchaeota	Unclassified Euryarchaeota	Unclassified Euryarchaeota	Unclassified Euryarchaeota			+
Archaea	Thaumarchaeota	Nitrososphaerales	Nitrososphaeraceae	Nitrososphaera	Nitrososphaera viennensis	+		+
Archaea	Thaumarchaeota	Nitrososphaerales	Nitrososphaeraceae	Nitrososphaera	Nitrososphaera_viennensis	+		+
Archaea	Thaumarchaeota	Unclassified Thaumarchaeota	Unclassified Thaumarchaeota	Unclassified Thaumarchaeota	Unclassified Thaumarchaeota	+
Archaea	Woesearchaeota	Unclassified Woesearchaeota	Unclassified Woesearchaeota	Unclassified Woesearchaeota	Unclassified Woesearchaeota		+		+
Archaea	Unclassified Archaea	Unclassified Archaea	Unclassified Archaea	Unclassified Archaea	Unclassified Archaea		+		+
Number of genera specifically enriched:						165	176	143	126	2	18	6	0	5	18	1	8

## Sheet: D_crop rotati_compartment_Fungi
fungal genera affected by crop rotation in the different compartments at the three different field locations
Phylum	Class	Order	Family	Genus	Italy				IRRI				Tarlac
					bulk soil		rhizosphere		bulk soil		rhizosphere		bulk soil		rhizosphere
					MM	RR	MM	RR	MR	RR	MR	RR	MR	RR	MR	RR
Ascomycota	Dothideomycetes	Capnodiales	Unclassified Capnodiales	Unclassified Capnodiales	+		+
Ascomycota	Dothideomycetes	Pleosporales	Cucurbitariaceae	Pyrenochaetopsis	+		+
Ascomycota	Dothideomycetes	Pleosporales	Massarinaceae	Massarina				+
Ascomycota	Dothideomycetes	Pleosporales	Phaeosphaeriaceae	Unclassified Phaeosphaeriaceae				+
Ascomycota	Dothideomycetes	Pleosporales	Pleosporaceae	Unclassified Pleosporaceae	+		+		+			+
Ascomycota	Dothideomycetes	Pleosporales	Sporormiaceae	Unclassified Sporormiaceae			+
Ascomycota	Dothideomycetes	Pleosporales	Unclassified Pleosporales	Unclassified Pleosporales								+
Ascomycota	Dothideomycetes	Unclassified Dothideomycetes	Unclassified Dothideomycetes	Unclassified Dothideomycetes	+				+
Ascomycota	Eurotiomycetes	Chaetothyriales	Herpotrichiellaceae	Cladophialophora	+
Ascomycota	Eurotiomycetes	Chaetothyriales	Herpotrichiellaceae	Exophiala	+		+
Ascomycota	Eurotiomycetes	Eurotiales	Eurotiales_fam_Incertae_sedis	Thermomyces			+
Ascomycota	Eurotiomycetes	Eurotiales	Trichocomaceae	Aspergillus	+		+
Ascomycota	Eurotiomycetes	Eurotiales	Trichocomaceae	Paecilomyces	+
Ascomycota	Eurotiomycetes	Eurotiales	Trichocomaceae	Penicillium	+		+
Ascomycota	Eurotiomycetes	Eurotiales	Trichocomaceae	Talaromyces			+
Ascomycota	Eurotiomycetes	Eurotiales	Trichocomaceae	Unclassified Trichocomaceae				+
Ascomycota	Eurotiomycetes	Eurotiales	Unclassified Eurotiales	Unclassified Eurotiales			+
Ascomycota	Eurotiomycetes	Onygenales	Arthrodermataceae	Arthroderma	+		+
Ascomycota	Eurotiomycetes	Onygenales	Onygenaceae	Aphanoascus	+
Ascomycota	Eurotiomycetes	Onygenales	Onygenaceae	Unclassified Onygenaceae	+
Ascomycota	Leotiomycetes	Helotiales	Helotiaceae	Neobulgaria				+
Ascomycota	Leotiomycetes	Helotiales	Helotiales_fam_Incertae_sedis	Scytalidium	+
Ascomycota	Leotiomycetes	Helotiales	Unclassified Helotiales	Unclassified Helotiales	+		+
Ascomycota	Leotiomycetes	Helotiales	Vibrisseaceae	Phialocephala	+		+
Ascomycota	Leotiomycetes	Leotiomycetes_ord_Incertae_sedis	Leotiomycetes_fam_Incertae_sedis	Geomyces		+
Ascomycota	Leotiomycetes	Leotiomycetes_ord_Incertae_sedis	Unclassified Leotiomycetes_ord_Incertae_sedis	Unclassified Leotiomycetes_ord_Incertae_sedis		+
Ascomycota	Leotiomycetes	Unclassified Leotiomycetes	Unclassified Leotiomycetes	Unclassified Leotiomycetes	+
Ascomycota	Orbiliomycetes	Orbiliales	Orbiliaceae	Arthrobotrys	+
Ascomycota	Orbiliomycetes	Orbiliales	Orbiliaceae	Monacrosporium		+
Ascomycota	Pezizomycetes	Pezizales	Pezizaceae	Peziza	+
Ascomycota	Pezizomycetes	Pezizales	Pezizaceae	Unclassified Pezizaceae	+		+
Ascomycota	Pezizomycetes	Pezizales	Unclassified Pezizales	Unclassified Pezizales				+
Ascomycota	Pezizomycotina_cls_Incertae_sedis	Pezizomycotina_ord_Incertae_sedis	Pezizomycotina_fam_Incertae_sedis	Scolecobasidium	+
Ascomycota	Pezizomycotina_cls_Incertae_sedis	Pezizomycotina_ord_Incertae_sedis	Pezizomycotina_fam_Incertae_sedis	Unclassified Pezizomycotina_fam_Incertae_sedis	+
Ascomycota	Saccharomycetes	Saccharomycetales	Unclassified Saccharomycetales	Unclassified Saccharomycetales	+
Ascomycota	Sordariomycetes	Chaetosphaeriales	Chaetosphaeriaceae	Chaetosphaeria	+		+
Ascomycota	Sordariomycetes	Chaetosphaeriales	Chaetosphaeriaceae	Unclassified Chaetosphaeriaceae		+	+
Ascomycota	Sordariomycetes	Chaetosphaeriales	Unclassified Chaetosphaeriales	Unclassified Chaetosphaeriales		+
Ascomycota	Sordariomycetes	Coniochaetales	Coniochaetaceae	Lecythophora	+
Ascomycota	Sordariomycetes	Coniochaetales	Unclassified Coniochaetales	Unclassified Coniochaetales	+
Ascomycota	Sordariomycetes	Diaporthales	Unclassified Diaporthales	Unclassified Diaporthales		+
Ascomycota	Sordariomycetes	Hypocreales	Bionectriaceae	Clonostachys		+	+
Ascomycota	Sordariomycetes	Hypocreales	Hypocreaceae	Trichoderma	+		+
Ascomycota	Sordariomycetes	Hypocreales	Hypocreales_fam_Incertae_sedis	Geosmithia		+
Ascomycota	Sordariomycetes	Hypocreales	Hypocreales_fam_Incertae_sedis	Unclassified Hypocreales_fam_Incertae_sedis	+			+
Ascomycota	Sordariomycetes	Hypocreales	Nectriaceae	Fusarium	+
Ascomycota	Sordariomycetes	Hypocreales	Nectriaceae	Septofusidium		+
Ascomycota	Sordariomycetes	Hypocreales	Nectriaceae	Unclassified Nectriaceae	+			+
Ascomycota	Sordariomycetes	Melanosporales	Ceratostomataceae	Harzia		+	+
Ascomycota	Sordariomycetes	Sordariales	Chaetomiaceae	Humicola	+		+
Ascomycota	Sordariomycetes	Sordariales	Chaetomiaceae	Mycothermus			+
Ascomycota	Sordariomycetes	Sordariales	Lasiosphaeriaceae	Unclassified Lasiosphaeriaceae	+		+
Ascomycota	Sordariomycetes	Sordariales	Sordariaceae	Unclassified Sordariaceae	+			+	+
Ascomycota	Sordariomycetes	Sordariales	Sordariales_fam_Incertae_sedis	Ramophialophora		+
Ascomycota	Sordariomycetes	Sordariales	Unclassified Sordariales	Unclassified Sordariales	+
Ascomycota	Sordariomycetes	Sordariomycetes_ord_Incertae_sedis	Sordariomycetes_fam_Incertae_sedis	Myrmecridium	+
Ascomycota	Sordariomycetes	Sordariomycetidae_ord_Incertae_sedis	Glomerellaceae	Colletotrichum		+
Ascomycota	Sordariomycetes	Trichosphaeriales	Trichosphaeriales_fam_Incertae_sedis	Unclassified Trichosphaeriales_fam_Incertae_sedis	+		+
Ascomycota	Sordariomycetes	Unclassified Sordariomycetes	Unclassified Sordariomycetes	Unclassified Sordariomycetes	+
Ascomycota	Sordariomycetes	Xylariales	Amphisphaeriaceae	Pestalotiopsis	+		+
Ascomycota	Sordariomycetes	Xylariales	Unclassified Xylariales	Unclassified Xylariales		+	+
Basidiomycota	Agaricomycetes	Agaricales	Bolbitiaceae	Bolbitius				+
Basidiomycota	Agaricomycetes	Agaricales	Entolomataceae	Entoloma	+			+
Basidiomycota	Agaricomycetes	Agaricales	Marasmiaceae	Macrocystidia			+
Basidiomycota	Agaricomycetes	Agaricales	Psathyrellaceae	Coprinopsis		+
Basidiomycota	Agaricomycetes	Agaricales	Psathyrellaceae	Unclassified Psathyrellaceae	+		+
Basidiomycota	Agaricomycetes	Agaricales	Strophariaceae	Galerina			+
Basidiomycota	Agaricomycetes	Agaricales	Strophariaceae	Psilocybe	+
Basidiomycota	Agaricomycetes	Agaricales	Unclassified Agaricales	Unclassified Agaricales	+
Basidiomycota	Agaricomycetes	Auriculariales	Unclassified Auriculariales	Unclassified Auriculariales			+
Basidiomycota	Agaricomycetes	Cantharellales	Ceratobasidiaceae	Ceratorhiza	+			+
Basidiomycota	Agaricomycetes	Cantharellales	Ceratobasidiaceae	Thanatephorus		+
Basidiomycota	Agaricomycetes	Cantharellales	Ceratobasidiaceae	Unclassified Ceratobasidiaceae			+
Basidiomycota	Agaricomycetes	Corticiales	Corticiaceae	Unclassified Corticiaceae			+
Basidiomycota	Agaricomycetes	Polyporales	Ganodermataceae	Ganoderma		+
Basidiomycota	Agaricomycetes	Polyporales	Limnoperdaceae	Limnoperdon	+
Basidiomycota	Agaricomycetes	Russulales	Stephanosporaceae	Unclassified Stephanosporaceae		+
Basidiomycota	Agaricomycetes	Sebacinales	Sebacinales_Group_B	Piriformospora	+			+
Basidiomycota	Agaricomycetes	Sebacinales	Sebacinales_Group_B	Unclassified Sebacinales_Group_B	+			+
Basidiomycota	Agaricomycetes	Sebacinales	Unclassified Sebacinales	Unclassified Sebacinales				+
Basidiomycota	Agaricomycetes	Trechisporales	Hydnodontaceae	Trechispora		+	+
Basidiomycota	Agaricomycetes	Trechisporales	Unclassified Trechisporales	Unclassified Trechisporales	+
Basidiomycota	Agaricostilbomycetes	Agaricostilbales	Chionosphaeraceae	Kurtzmanomyces				+
Basidiomycota	Agaricostilbomycetes	Agaricostilbales	Chionosphaeraceae	Unclassified Chionosphaeraceae		+
Basidiomycota	Cystobasidiomycetes	Unclassified Cystobasidiomycetes	Unclassified Cystobasidiomycetes	Unclassified Cystobasidiomycetes	+			+
Basidiomycota	Exobasidiomycetes	Tilletiales	Tilletiaceae	Tilletia	+
Basidiomycota	Microbotryomycetes	Leucosporidiales	Unclassified Leucosporidiales	Unclassified Leucosporidiales	+			+
Basidiomycota	Microbotryomycetes	Sporidiobolales	Sporidiobolales_fam_Incertae_sedis	Rhodosporidium		+
Basidiomycota	Microbotryomycetes	Unclassified Microbotryomycetes	Unclassified Microbotryomycetes	Unclassified Microbotryomycetes	+			+
Basidiomycota	Tremellomycetes	Cystofilobasidiales	Cystofilobasidiaceae	Mrakia	+			+
Basidiomycota	Tremellomycetes	Cystofilobasidiales	Cystofilobasidiaceae	Udeniomyces	+
Basidiomycota	Tremellomycetes	Cystofilobasidiales	Cystofilobasidiales_fam_Incertae_sedis	Mrakiella	+
Basidiomycota	Tremellomycetes	Tremellales	Tremellales_fam_Incertae_sedis	Cryptococcus	+		+
Basidiomycota	Tremellomycetes	Unclassified Tremellomycetes	Unclassified Tremellomycetes	Unclassified Tremellomycetes	+
Basidiomycota	Ustilaginomycetes	Ustilaginales	Ustilaginaceae	Ustilago			+
Chytridiomycota	Chytridiomycetes	Chytridiales	Chytridiaceae	Unclassified Chytridiaceae			+
Chytridiomycota	Chytridiomycetes	Chytridiales	Chytridiales_fam_Incertae_sedis	Delfinachytrium		+
Chytridiomycota	Chytridiomycetes	Rhizophydiales	Aquamycetaceae	Aquamyces	+
Chytridiomycota	Chytridiomycetes	Spizellomycetales	Spizellomycetaceae	Spizellomyces				+
Chytridiomycota	Chytridiomycetes	Spizellomycetales	Spizellomycetaceae	Unclassified Spizellomycetaceae		+
Chytridiomycota	Monoblepharidomycetes	Monoblepharidales	Unclassified Monoblepharidales	Unclassified Monoblepharidales	+			+
Chytridiomycota	Unclassified Chytridiomycota	Unclassified Chytridiomycota	Unclassified Chytridiomycota	Unclassified Chytridiomycota	+			+
Glomeromycota	Glomeromycetes	Archaeosporales	Unclassified Archaeosporales	Unclassified Archaeosporales		+
Glomeromycota	Glomeromycetes	Diversisporales	Acaulosporaceae	Entrophospora	+
Unclassified Fungi	Unclassified Fungi	Unclassified Fungi	Unclassified Fungi	Unclassified Fungi	+
Zygomycota	Mortierellomycotina_cls_Incertae_sedis	Mortierellales	Mortierellaceae	Mortierella	+		+
Zygomycota	Mortierellomycotina_cls_Incertae_sedis	Mortierellales	Mortierellaceae	Unclassified Mortierellaceae	+			+
Zygomycota	Mucoromycotina_cls_Incertae_sedis	Mucorales	Umbelopsidaceae	Umbelopsis	+		+
Number of genera specifically enriched:					63	23	37	23	3	0	0	2	0	0	0	0

## Sheet: E_straw_Bac
bacterial and archaeal genera affected by straw treatment
pairwise comparisons of samples treated with or without straw
Domain	Phylum	Class	Order	Family	Genus	Italy								IRRI								Tarlac
						MM				RR				MR				RR				MR				RR
						bulk soil		rhizosphere		bulk soil		rhizosphere		bulk soil		rhizosphere		bulk soil		rhizosphere		bulk soil		rhizosphere		bulk soil		rhizosphere
						straw	no straw	straw	no straw	straw	no straw	straw	no straw	straw	no straw	straw	no straw	straw	no straw	straw	no straw	straw	no straw	straw	no straw	straw	no straw	straw	no straw
Bacteria	Acidobacteria	Acidobacteria_Gp1	Edaphobacter	Edaphobacter_modestus	Unclassified Edaphobacter_modestus	+		+
Bacteria	Acidobacteria	Acidobacteria_Gp16	Unclassified Acidobacteria_Gp16	Unclassified Acidobacteria_Gp16	Unclassified Acidobacteria_Gp16																			+
Bacteria	Acidobacteria	Acidobacteria_Gp3	Candidatus_Solibacter	Unclassified Candidatus_Solibacter	Unclassified Candidatus_Solibacter		+
Bacteria	Acidobacteria	Acidobacteria_Gp3	Unclassified Acidobacteria_Gp3	Unclassified Acidobacteria_Gp3	Unclassified Acidobacteria_Gp3						+
Bacteria	Acidobacteria	Acidobacteria_Gp4	Aridibacter	Unclassified Aridibacter	Unclassified Aridibacter							+
Bacteria	Acidobacteria	Acidobacteria_Gp4	Blastocatella	Blastocatella_fastidiosa	Unclassified Blastocatella_fastidiosa																			+
Bacteria	Acidobacteria	Acidobacteria_Gp5	Gp5	Unclassified Gp5	Unclassified Gp5		+
Bacteria	Acidobacteria	Acidobacteria_Gp6	Gp6	Unclassified Gp6	Unclassified Gp6							+
Bacteria	Acidobacteria	Holophagae	Holophagales	Holophagaceae	Geothrix																				+
Bacteria	Actinobacteria	Actinobacteria	Actinomycetales	Brevibacteriaceae	Brevibacterium	+						+
Bacteria	Actinobacteria	Actinobacteria	Actinomycetales	Catenulisporaceae	Catenulispora				+
Bacteria	Actinobacteria	Actinobacteria	Actinomycetales	Cellulomonadaceae	Cellulomonas							+
Bacteria	Actinobacteria	Actinobacteria	Actinomycetales	Dermabacteraceae	Brachybacterium					+		+
Bacteria	Actinobacteria	Actinobacteria	Actinomycetales	Microbacteriaceae	Leifsonia	+																		+
Bacteria	Actinobacteria	Actinobacteria	Actinomycetales	Microbacteriaceae	Microbacterium	+
Bacteria	Actinobacteria	Actinobacteria	Actinomycetales	Nocardiopsaceae	Nocardiopsis	+																		+
Bacteria	Actinobacteria	Actinobacteria	Actinomycetales	Promicromonosporaceae	Promicromonospora					+		+												+
Bacteria	Actinobacteria	Actinobacteria	Actinomycetales	Streptomycetaceae	Streptomyces					+
Bacteria	Actinobacteria	Actinobacteria	Actinomycetales	Streptosporangiaceae	Unclassified Streptosporangiaceae																			+
Bacteria	Armatimonadetes	Armatimonadetes_gp4	Unclassified Armatimonadetes_gp4	Unclassified Armatimonadetes_gp4	Unclassified Armatimonadetes_gp4							+
Bacteria	Armatimonadetes	Fimbriimonadia	Fimbriimonadales	Fimbriimonadaceae	Fimbriimonas							+
Bacteria	Bacteroidetes	Cytophagia	Cytophagales	Cytophagaceae	Adhaeribacter					+
Bacteria	Bacteroidetes	Cytophagia	Cytophagales	Cytophagaceae	Cytophaga					+
Bacteria	Bacteroidetes	Cytophagia	Cytophagales	Cytophagaceae	Larkinella											+								+
Bacteria	Bacteroidetes	Cytophagia	Cytophagales	Cytophagaceae	Unclassified Cytophagaceae					+
Bacteria	Bacteroidetes	Flavobacteriia	Flavobacteriales	Flavobacteriaceae	Flavobacterium							+
Bacteria	Bacteroidetes	Sphingobacteriia	Sphingobacteriales	Chitinophagaceae	Niastella					+		+
Bacteria	Bacteroidetes	Sphingobacteriia	Sphingobacteriales	Sphingobacteriaceae	Mucilaginibacter	+				+
Bacteria	Bacteroidetes	Sphingobacteriia	Sphingobacteriales	Sphingobacteriaceae	Olivibacter									+
Bacteria	Bacteroidetes	Sphingobacteriia	Sphingobacteriales	Sphingobacteriaceae	Parapedobacter																							+
Bacteria	Bacteroidetes	Sphingobacteriia	Sphingobacteriales	Sphingobacteriaceae	Sphingobacterium					+
Bacteria	Bacteroidetes	Sphingobacteriia	Sphingobacteriales	Sphingobacteriaceae	Unclassified Sphingobacteriaceae	+							+
Bacteria	Bacteroidetes	Unclassified Bacteroidetes	Unclassified Bacteroidetes	Unclassified Bacteroidetes	Unclassified Bacteroidetes					+
Bacteria	candidate_division_WPS-1	WPS-1_genera_incertae_sedis	Unclassified WPS-1_genera_incertae_sedis	Unclassified WPS-1_genera_incertae_sedis	Unclassified WPS-1_genera_incertae_sedis							+
Bacteria	candidate_division_WPS-2	Unclassified candidate_division_WPS-2	Unclassified candidate_division_WPS-2	Unclassified candidate_division_WPS-2	Unclassified candidate_division_WPS-2						+
Bacteria	Chloroflexi	Unclassified Chloroflexi	Unclassified Chloroflexi	Unclassified Chloroflexi	Unclassified Chloroflexi						+
Bacteria	Firmicutes	Bacilli	Bacillales	Alicyclobacillaceae	Tumebacillus						+
Bacteria	Firmicutes	Bacilli	Bacillales	Bacillaceae_1	Bacillus							+
Bacteria	Firmicutes	Bacilli	Bacillales	Paenibacillaceae_1	Cohnella					+
Bacteria	Firmicutes	Bacilli	Bacillales	Paenibacillaceae_2	Unclassified Paenibacillaceae_2		+
Bacteria	Firmicutes	Bacilli	Bacillales	Staphylococcaceae	Staphylococcus	+				+
Bacteria	Firmicutes	Clostridia	Clostridiales	Clostridiaceae_1	Clostridium_sensu_stricto		+
Bacteria	Firmicutes	Clostridia	Clostridiales	Clostridiaceae_1	Unclassified Clostridiaceae_1		+
Bacteria	Planctomycetes	Planctomycetia	Planctomycetales	Planctomycetaceae	Blastopirellula					+		+
Bacteria	Planctomycetes	Planctomycetia	Planctomycetales	Planctomycetaceae	Singulisphaera			+
Bacteria	Proteobacteria	Alphaproteobacteria	Alphaproteobacteria_incertae_sedis	Rhizomicrobium	Rhizomicrobium_electricum												+
Bacteria	Proteobacteria	Alphaproteobacteria	Caulobacterales	Caulobacteraceae	Asticcacaulis					+
Bacteria	Proteobacteria	Alphaproteobacteria	Caulobacterales	Caulobacteraceae	Brevundimonas					+		+		+
Bacteria	Proteobacteria	Alphaproteobacteria	Caulobacterales	Caulobacteraceae	Caulobacter							+
Bacteria	Proteobacteria	Alphaproteobacteria	Caulobacterales	Caulobacteraceae	Phenylobacterium	+				+
Bacteria	Proteobacteria	Alphaproteobacteria	Caulobacterales	Caulobacteraceae	Unclassified Caulobacteraceae	+		+		+
Bacteria	Proteobacteria	Alphaproteobacteria	Rhizobiales	Aurantimonadaceae	Aureimonas									+										+
Bacteria	Proteobacteria	Alphaproteobacteria	Rhizobiales	Hyphomicrobiaceae	Devosia	+				+		+
Bacteria	Proteobacteria	Alphaproteobacteria	Rhizobiales	Methylobacteriaceae	Microvirga					+						+
Bacteria	Proteobacteria	Alphaproteobacteria	Rhizobiales	Phyllobacteriaceae	Mesorhizobium					+														+
Bacteria	Proteobacteria	Alphaproteobacteria	Rhizobiales	Rhizobiaceae	Kaistia			+
Bacteria	Proteobacteria	Alphaproteobacteria	Rhizobiales	Rhizobiaceae	Rhizobium	+				+
Bacteria	Proteobacteria	Alphaproteobacteria	Rhizobiales	Xanthobacteraceae	Pseudolabrys					+		+
Bacteria	Proteobacteria	Alphaproteobacteria	Rhodospirillales	Reyranella	Unclassified Reyranella																			+
Bacteria	Proteobacteria	Alphaproteobacteria	Rhodospirillales	Rhodospirillaceae	Dongia					+		+
Bacteria	Proteobacteria	Alphaproteobacteria	Rhodospirillales	Rhodospirillaceae	Lacibacterium							+
Bacteria	Proteobacteria	Alphaproteobacteria	Sphingomonadales	Erythrobacteraceae	Unclassified Erythrobacteraceae							+		+										+
Bacteria	Proteobacteria	Alphaproteobacteria	Sphingomonadales	Sphingomonadaceae	Sphingobium																			+
Bacteria	Proteobacteria	Alphaproteobacteria	Sphingomonadales	Sphingomonadaceae	Sphingopyxis							+												+
Bacteria	Proteobacteria	Alphaproteobacteria	Unclassified Alphaproteobacteria	Unclassified Alphaproteobacteria	Unclassified Alphaproteobacteria	+		+		+														+
Bacteria	Proteobacteria	Betaproteobacteria	Burkholderiales	Burkholderiaceae	Burkholderia	+																			+
Bacteria	Proteobacteria	Betaproteobacteria	Burkholderiales	Burkholderiaceae	Cupriavidus							+												+
Bacteria	Proteobacteria	Betaproteobacteria	Burkholderiales	Burkholderiaceae	Ralstonia								+												+
Bacteria	Proteobacteria	Betaproteobacteria	Burkholderiales	Comamonadaceae	Simplicispira							+
Bacteria	Proteobacteria	Betaproteobacteria	Burkholderiales	Oxalobacteraceae	Massilia																				+
Bacteria	Proteobacteria	Deltaproteobacteria	Bdellovibrionales	Bdellovibrionaceae	Bdellovibrio					+
Bacteria	Proteobacteria	Deltaproteobacteria	Bdellovibrionales	Bdellovibrionaceae	Vampirovibrio					+
Bacteria	Proteobacteria	Deltaproteobacteria	Myxococcales	Polyangiaceae	Chondromyces					+
Bacteria	Proteobacteria	Deltaproteobacteria	Syntrophobacterales	Syntrophobacteraceae	Syntrophobacter						+
Bacteria	Proteobacteria	Gammaproteobacteria	Xanthomonadales	Sinobacteraceae	Steroidobacter					+		+
Bacteria	Proteobacteria	Gammaproteobacteria	Xanthomonadales	Xanthomonadaceae	Dokdonella					+		+
Bacteria	Proteobacteria	Gammaproteobacteria	Xanthomonadales	Xanthomonadaceae	Luteimonas									+														+
Bacteria	Proteobacteria	Gammaproteobacteria	Xanthomonadales	Xanthomonadaceae	Unclassified Xanthomonadaceae	+																			+
Bacteria	Proteobacteria	Gammaproteobacteria	Xanthomonadales	Unclassified Xanthomonadales	Unclassified Xanthomonadales					+
Bacteria	Verrucomicrobia	Opitutae	Opitutales	Opitutaceae	Unclassified Opitutaceae							+
Bacteria	Verrucomicrobia	Spartobacteria	Terrimicrobium	Terrimicrobium_sacchariphilum	Unclassified Terrimicrobium_sacchariphilum					+
Bacteria	Verrucomicrobia	Subdivision3	Subdivision3_genera_incertae_sedis	Unclassified Subdivision3_genera_incertae_sedis	Unclassified Subdivision3_genera_incertae_sedis																				+
Bacteria	Verrucomicrobia	Verrucomicrobiae	Verrucomicrobiales	Verrucomicrobiaceae	Prosthecobacter					+		+
Bacteria	Verrucomicrobia	Verrucomicrobiae	Verrucomicrobiales	Verrucomicrobiaceae	Roseimicrobium																			+
Bacteria	Verrucomicrobia	Verrucomicrobiae	Verrucomicrobiales	Verrucomicrobiaceae	Verrucomicrobium	+						+
Bacteria	Verrucomicrobia	Verrucomicrobiae	Verrucomicrobiales	Unclassified Verrucomicrobiales	Unclassified Verrucomicrobiales	+						+
Bacteria	Verrucomicrobia	Unclassified Verrucomicrobia	Unclassified Verrucomicrobia	Unclassified Verrucomicrobia	Unclassified Verrucomicrobia							+
Archaea	Thaumarchaeota	Nitrososphaerales	Nitrososphaeraceae	Nitrososphaera	Nitrososphaera_viennensis								+
Archaea	Unclassified Archaea	Unclassified Archaea	Unclassified Archaea	Unclassified Archaea	Unclassified Archaea								+
Number of genera specifically enriched:						17	5	5	1	32	5	30	4	5		2	1							16	6			2

## Sheet: F_straw_Fungi
fungal genera affected by straw treatment
pairwise comparisons of samples treated with or without straw
Phylum	Class	Order	Family	Genus	Italy								IRRI								Tarlac
					MM				RR				MR				RR				MR				RR
					bulk soil		rhizosphere		bulk soil		rhizosphere		bulk soil		rhizosphere		bulk soil		rhizosphere		bulk soil		rhizosphere		bulk soil		rhizosphere
					straw	no straw	straw	no straw	straw	no straw	straw	no straw	straw	no straw	straw	no straw	straw	no straw	straw	no straw	straw	no straw	straw	no straw	straw	no straw	straw	no straw
Ascomycota	Dothideomycetes	Pleosporales	Sporormiaceae	Unclassified Sporormiaceae	+																					+
Ascomycota	Eurotiomycetes	Chaetothyriales	Herpotrichiellaceae	Exophiala		+		+
Ascomycota	Eurotiomycetes	Eurotiales	Trichocomaceae	Aspergillus	+
Ascomycota	Eurotiomycetes	Eurotiales	Unclassified Eurotiales	Unclassified Eurotiales							+
Ascomycota	Eurotiomycetes	Onygenales	Arthrodermataceae	Arthroderma		+
Ascomycota	Eurotiomycetes	Onygenales	Onygenaceae	Aphanoascus						+
Ascomycota	Eurotiomycetes	Onygenales	Unclassified Onygenales	Unclassified Onygenales						+
Ascomycota	Leotiomycetes	Helotiales	Helotiaceae	Neobulgaria		+				+
Ascomycota	Leotiomycetes	Helotiales	Unclassified Helotiales	Unclassified Helotiales		+
Ascomycota	Pezizomycetes	Pezizales	Pezizaceae	Unclassified Pezizaceae						+
Ascomycota	Pezizomycetes	Pezizales	Pyronemataceae	Unclassified Pyronemataceae		+
Ascomycota	Sordariomycetes	Chaetosphaeriales	Chaetosphaeriaceae	Unclassified Chaetosphaeriaceae				+
Ascomycota	Sordariomycetes	Diaporthales	Togniniaceae	Phaeoacremonium							+
Ascomycota	Sordariomycetes	Hypocreales	Hypocreales_fam_Incertae_sedis	Myrothecium				+
Ascomycota	Sordariomycetes	Hypocreales	Nectriaceae	Fusarium	+		+
Ascomycota	Sordariomycetes	Sordariales	Lasiosphaeriaceae	Unclassified Lasiosphaeriaceae				+				+
Ascomycota	Sordariomycetes	Sordariales	Sordariaceae	Unclassified Sordariaceae	+		+		+			+
Ascomycota	Sordariomycetes	Trichosphaeriales	Trichosphaeriales_fam_Incertae_sedis	Unclassified Trichosphaeriales_fam_Incertae_sedis		+
Ascomycota	Sordariomycetes	Xylariales	Amphisphaeriaceae	Pestalotiopsis				+			+
Ascomycota	Unclassified Ascomycota	Unclassified Ascomycota	Unclassified Ascomycota	Unclassified Ascomycota						+
Basidiomycota	Agaricomycetes	Agaricales	Agaricaceae	Unclassified Agaricaceae						+
Basidiomycota	Agaricomycetes	Agaricales	Entolomataceae	Entoloma						+
Basidiomycota	Agaricomycetes	Auriculariales	Unclassified Auriculariales	Unclassified Auriculariales				+
Basidiomycota	Microbotryomycetes	Leucosporidiales	Unclassified Leucosporidiales	Unclassified Leucosporidiales		+				+
Basidiomycota	Microbotryomycetes	Unclassified Microbotryomycetes	Unclassified Microbotryomycetes	Unclassified Microbotryomycetes						+		+
Basidiomycota	Tremellomycetes	Tremellales	Tremellales_fam_Incertae_sedis	Cryptococcus		+				+
Basidiomycota	Unclassified Basidiomycota	Unclassified Basidiomycota	Unclassified Basidiomycota	Unclassified Basidiomycota		+				+
Chytridiomycota	Chytridiomycetes	Chytridiales	Chytridiaceae	Unclassified Chytridiaceae			+
Zygomycota	Mucoromycotina_cls_Incertae_sedis	Mucorales	Rhizopodaceae	Rhizopus					+
Number of genera specifically enriched:					4	9	3	6	2	11	3	3														1
